# Supplementary material for: Antiproliferative effects of resorcylic acid lactones from the Beibu Gulf coral-derived fungus Curvularia lunata GXIMD 02512 on prostate cancer cells
Source: Royal Society of Chemistry journal article supplement (doi:10.1039/d4ra06292b), 2024-01-01
Supplement: d4ra06292b1.pdf [file d4ra06292b1.pdf]

## SUPPLEMENTARY MATERIAL

### **Resorcylic acid lactones from the Beibu Gulf coral-derived fungus *Curvularia lunata* GXIMD 02512 with antiproliferative effects on prostate cancer cells**

Jiayi Wang <sup>‡,a</sup>, Humu Lu <sup>‡,a</sup>, Wenxuan Fang <sup>a,b</sup>, Miaoping Lin <sup>a</sup>, Yuyao Feng <sup>a</sup>, Xin Qi <sup>a</sup>,  
Chenghai Gao <sup>a</sup>, Yonghong Liu <sup>a</sup>, Xueni Wang <sup>b\*</sup> and Xiaowei Luo <sup>a\*</sup>

<sup>a</sup> Guangxi Key Laboratory of Marine Drugs, Institute of Marine Drugs, Guangxi  
University of Chinese Medicine, Nanning 530200, China;

<sup>b</sup> Guangxi Zhuang Yao Medicine Center of Engineering and Technology, Guangxi  
University of Chinese Medicine, Nanning 530200, China;

\*Correspondence: luoxiaowei1991@126.com (X.L); wangxueni@gxtcmu.edu.cn  
(X.W.);

<sup>‡</sup> These authors contributed equally to this work.

## Table of contents

|                                                                                                                                   |    |
|-----------------------------------------------------------------------------------------------------------------------------------|----|
| <b>Figure S1.</b> <sup>1</sup> H NMR spectrum of curvulomycin A ( <b>1</b> ) (500 MHz, DMSO- <i>d</i> <sub>6</sub> ).....         | 4  |
| <b>Figure S2.</b> <sup>13</sup> C NMR spectrum of curvulomycin A ( <b>1</b> ) (125 MHz, DMSO- <i>d</i> <sub>6</sub> ).....        | 4  |
| <b>Figure S3.</b> HSQC spectrum of curvulomycin A ( <b>1</b> ) (DMSO- <i>d</i> <sub>6</sub> ).....                                | 5  |
| <b>Figure S4.</b> HMBC spectrum of curvulomycin A ( <b>1</b> ) (DMSO- <i>d</i> <sub>6</sub> ) .....                               | 5  |
| <b>Figure S5.</b> <sup>1</sup> H- <sup>1</sup> H COSY spectrum of curvulomycin A ( <b>1</b> ) (DMSO- <i>d</i> <sub>6</sub> )..... | 6  |
| <b>Figure S6.</b> NOESY spectrum of curvulomycin A ( <b>1</b> ) (DMSO- <i>d</i> <sub>6</sub> ).....                               | 6  |
| <b>Figure S7.</b> HR-ESI-MS spectrum of curvulomycin A ( <b>1</b> ) .....                                                         | 7  |
| <b>Figure S8.</b> UV spectrum of curvulomycin A ( <b>1</b> ) .....                                                                | 7  |
| <b>Figure S9.</b> <sup>1</sup> H NMR spectrum of curvulomycin B ( <b>2</b> ) (500 MHz, CD <sub>3</sub> OD) .....                  | 8  |
| <b>Figure S10.</b> <sup>13</sup> C NMR spectrum of curvulomycin B ( <b>2</b> ) (125 MHz, CD <sub>3</sub> OD) .....                | 8  |
| <b>Figure S11.</b> HSQC spectrum of curvulomycin B ( <b>2</b> ) (CD <sub>3</sub> OD) .....                                        | 9  |
| <b>Figure S12.</b> HMBC spectrum of curvulomycin B ( <b>2</b> ) (CD <sub>3</sub> OD) .....                                        | 9  |
| <b>Figure S13.</b> <sup>1</sup> H- <sup>1</sup> H COSY spectrum of curvulomycin B ( <b>2</b> ) (CD <sub>3</sub> OD).....          | 10 |
| <b>Figure S14.</b> NOESY spectrum of curvulomycin B ( <b>2</b> ) (CD <sub>3</sub> OD).....                                        | 10 |
| <b>Figure S15.</b> HR-ESIMS spectrum of curvulomycin B ( <b>2</b> ).....                                                          | 11 |
| <b>Figure S16.</b> UV spectrum of curvulomycin B ( <b>2</b> ) .....                                                               | 11 |
| <b>Figure S17.</b> <sup>1</sup> H NMR spectrum of curvulomycin C ( <b>3</b> ) (500 MHz, CD <sub>3</sub> OD) .....                 | 12 |
| <b>Figure S18.</b> <sup>13</sup> C NMR spectrum of curvulomycin C ( <b>3</b> ) (125 MHz, CD <sub>3</sub> OD) .....                | 12 |
| <b>Figure S19.</b> HSQC spectrum of curvulomycin C ( <b>3</b> ) (CD <sub>3</sub> OD) .....                                        | 13 |
| <b>Figure S20.</b> HMBC spectrum of curvulomycin C ( <b>3</b> ) (CD <sub>3</sub> OD) .....                                        | 13 |
| <b>Figure S21.</b> <sup>1</sup> H- <sup>1</sup> H COSY spectrum of curvulomycin C ( <b>3</b> ) (CD <sub>3</sub> OD).....          | 14 |
| <b>Figure S22.</b> NOESY spectrum of curvulomycin C ( <b>3</b> ) (CD <sub>3</sub> OD).....                                        | 14 |
| <b>Figure S23.</b> HR-ESIMS spectrum of curvulomycin C ( <b>3</b> ).....                                                          | 15 |
| <b>Figure S24.</b> UV spectrum of curvulomycin C ( <b>3</b> ) .....                                                               | 15 |
| <b>Figure S25.</b> <sup>1</sup> H NMR spectrum of curvulomycin D ( <b>4</b> ) (500 MHz, CD <sub>3</sub> OD) .....                 | 16 |
| <b>Figure S26.</b> <sup>13</sup> C NMR spectrum of curvulomycin D ( <b>4</b> ) (125 MHz, CD <sub>3</sub> OD) .....                | 16 |
| <b>Figure S27.</b> HSQC spectrum of curvulomycin D ( <b>4</b> ) (CD <sub>3</sub> OD).....                                         | 17 |
| <b>Figure S28.</b> HMBC spectrum of curvulomycin D ( <b>4</b> ) (CD <sub>3</sub> OD).....                                         | 17 |
| <b>Figure S29.</b> <sup>1</sup> H- <sup>1</sup> H COSY spectrum of curvulomycin D ( <b>4</b> ) (CD <sub>3</sub> OD) .....         | 18 |
| <b>Figure S30.</b> NOESY spectrum of curvulomycin D ( <b>4</b> ) (CD <sub>3</sub> OD) .....                                       | 18 |

|                                                                                                                                                     |    |
|-----------------------------------------------------------------------------------------------------------------------------------------------------|----|
| <b>Figure S31.</b> HR-ESIMS spectrum of curvulomycin D ( <b>4</b> ) .....                                                                           | 19 |
| <b>Figure S32.</b> UV spectrum of curvulomycin D ( <b>4</b> ) .....                                                                                 | 19 |
| <b>Table S1.</b> Energies of <b>1</b> at MMFF94 force field. ....                                                                                   | 20 |
| <b>Table S2.</b> Energies of <b>1</b> at B3LYP/6-31+g(d) level in methanol. ....                                                                    | 20 |
| <b>Figure S33.</b> The optimized conformers and equilibrium populations of <b>1</b> . ....                                                          | 21 |
| <b>Table S3.</b> Energies of <b>2</b> at MMFF94 force field. ....                                                                                   | 21 |
| <b>Table S4.</b> Energies of <b>2</b> at B3LYP/6-31+g(d) level in methanol. ....                                                                    | 22 |
| <b>Figure S34.</b> The optimized conformers and equilibrium populations of <b>2</b> . ....                                                          | 24 |
| <b>Table S5.</b> Energies of <b>3</b> at MMFF94 force field. ....                                                                                   | 24 |
| <b>Table S6.</b> Energies of <b>3</b> at B3LYP/6-31+g(d) level in methanol. ....                                                                    | 25 |
| <b>Figure S35.</b> The optimized conformers and equilibrium populations of <b>3</b> . ....                                                          | 26 |
| <b>Table S7.</b> Energies of <b>4</b> at MMFF94 force field. ....                                                                                   | 26 |
| <b>Table S8.</b> Energies of <b>4</b> at B3LYP/6-31+g(d) level in methanol. ....                                                                    | 28 |
| <b>Table S9.</b> Specific data of the half-bandwidth and UV shifts for compounds <b>1-4</b> . ....                                                  | 32 |
| <b>Scheme S1.</b> The isolation process of compounds <b>1-10</b> . ....                                                                             | 33 |
| <b>Physicochemical data of known compounds 5-12.</b> .....                                                                                          | 33 |
| <b>The ITS sequence of <i>Curvularia lunata</i> GXIMD 02512</b> .....                                                                               | 34 |
| <b>Figure S38.</b> Cytotoxicity against 22RV1 and PC-3 cell lines of <b>1</b> (left) and <b>5</b> (right) .....                                     | 35 |
| <b>Figure S39.</b> Cytotoxicity of compounds <b>1</b> and <b>5</b> towards two normal prostate cancer cells, WPMY-1 (left) and RWPE-1 (right). .... | 35 |
| <b>Figure S40.</b> the primary anti-PC mechanism of compound <b>1</b> .....                                                                         | 35 |

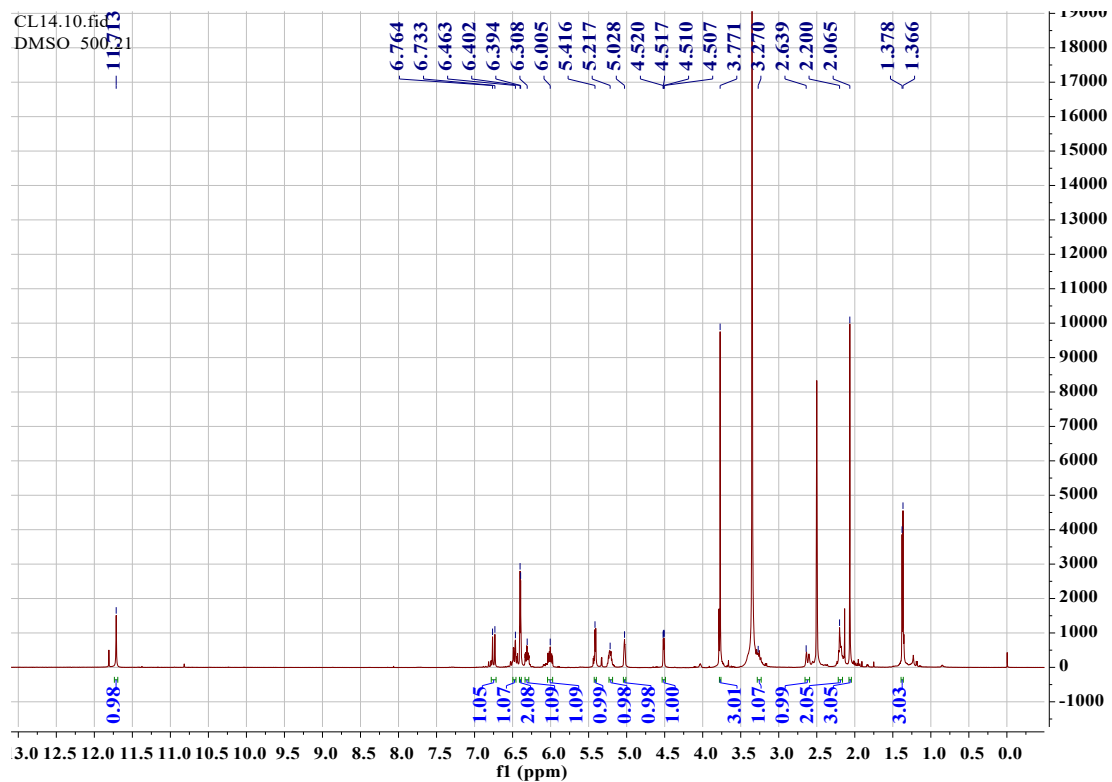

Figure S1.  $^1\text{H}$  NMR spectrum of curvulomycin A (**1**) (500 MHz,  $\text{DMSO-}d_6$ )

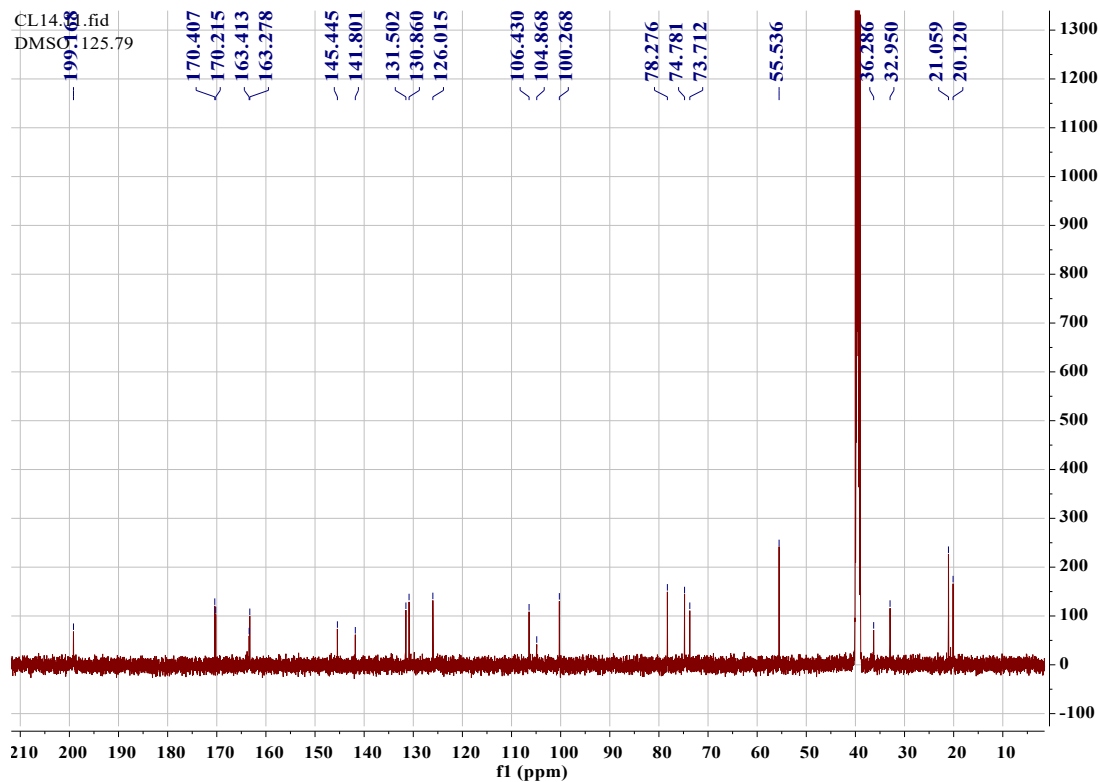

Figure S2.  $^{13}\text{C}$  NMR spectrum of curvulomycin A (**1**) (125 MHz,  $\text{DMSO-}d_6$ )

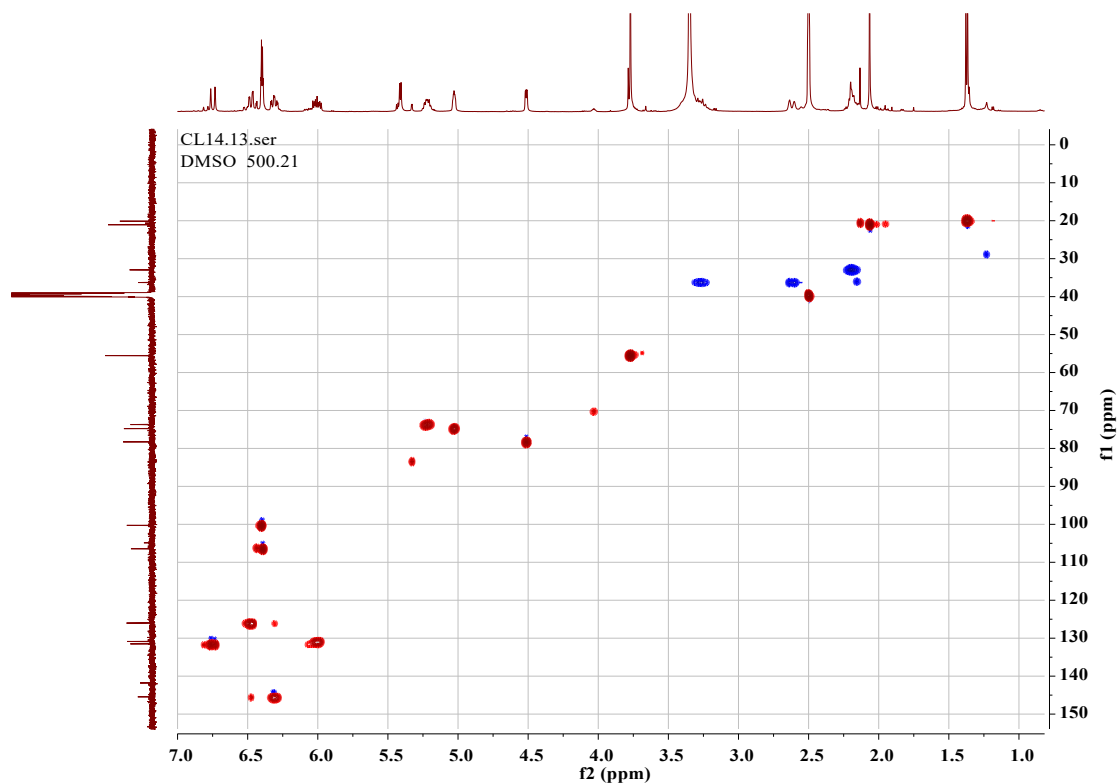

Figure S3. HSQC spectrum of curvulomycin A (**1**) (DMSO- $d_6$ )

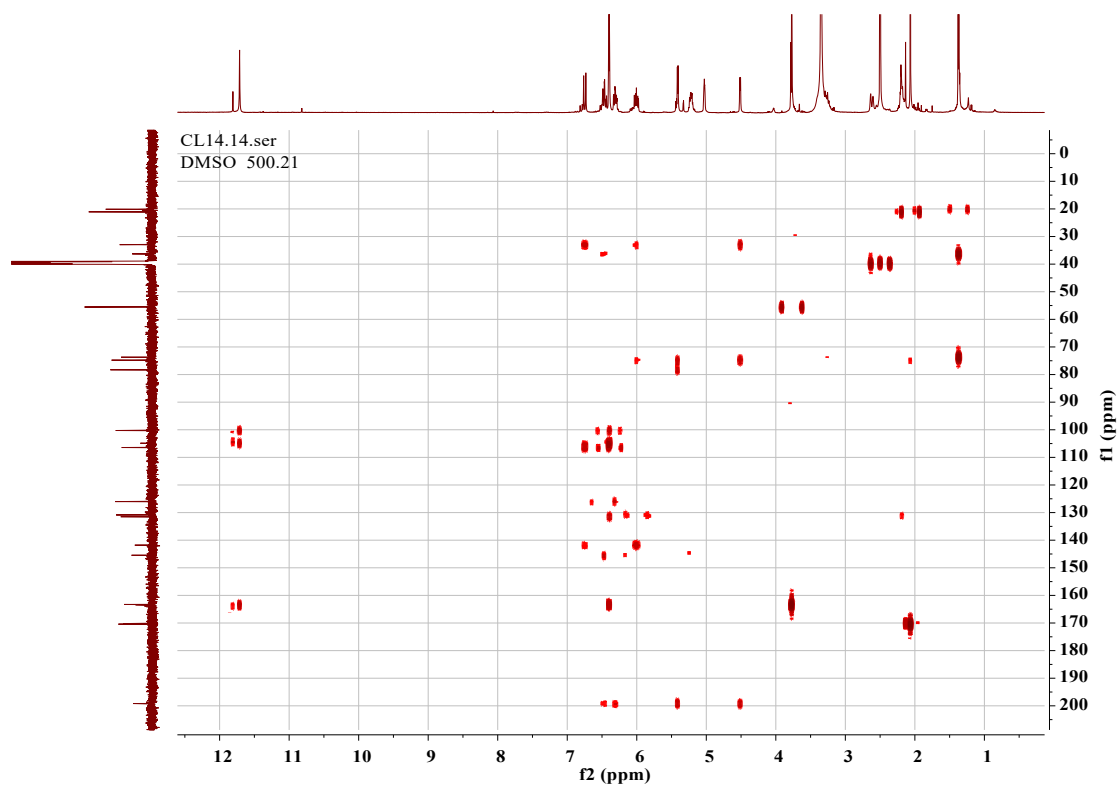

Figure S4. HMBC spectrum of curvulomycin A (**1**) (DMSO- $d_6$ )

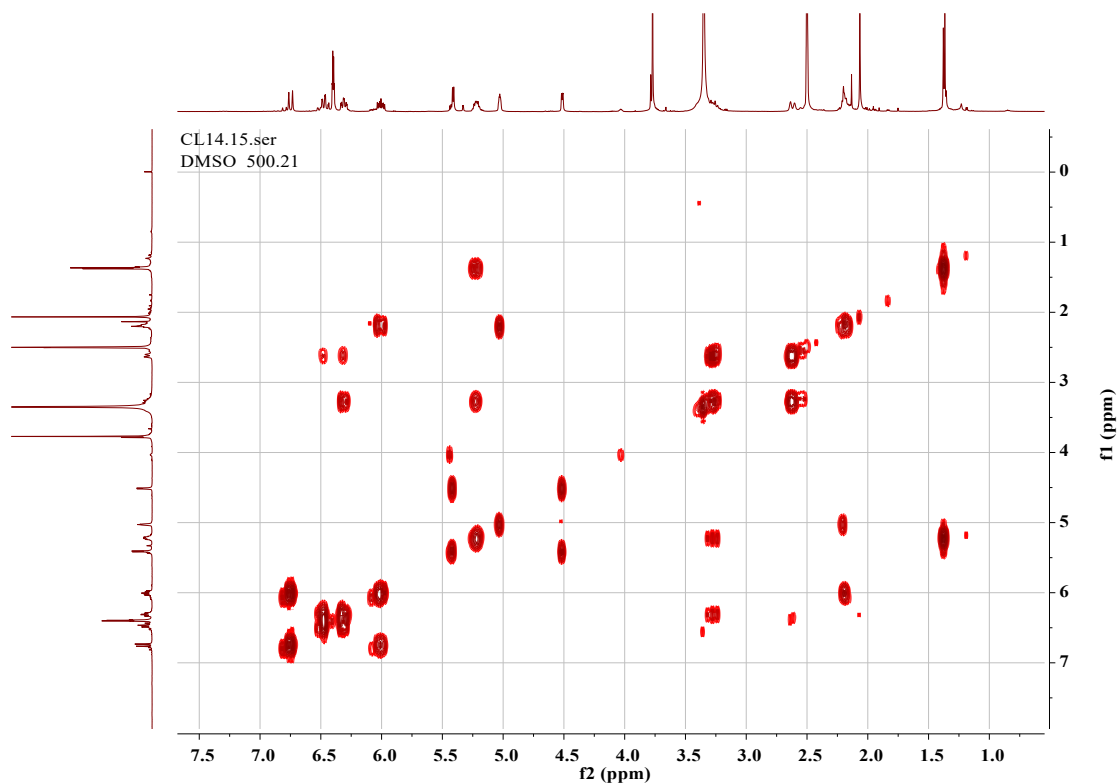

Figure S5.  $^1\text{H}$ - $^1\text{H}$  COSY spectrum of curvulomycin A (**1**) ( $\text{DMSO-}d_6$ )

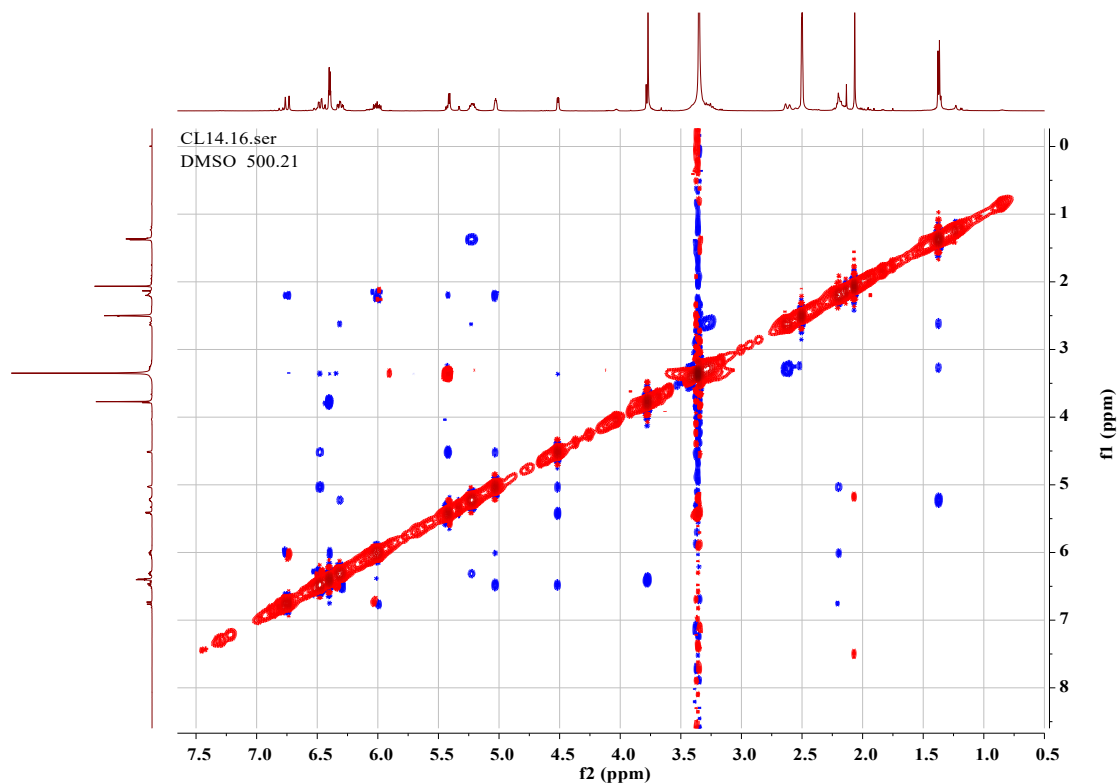

Figure S6. NOESY spectrum of curvulomycin A (**1**) ( $\text{DMSO-}d_6$ )

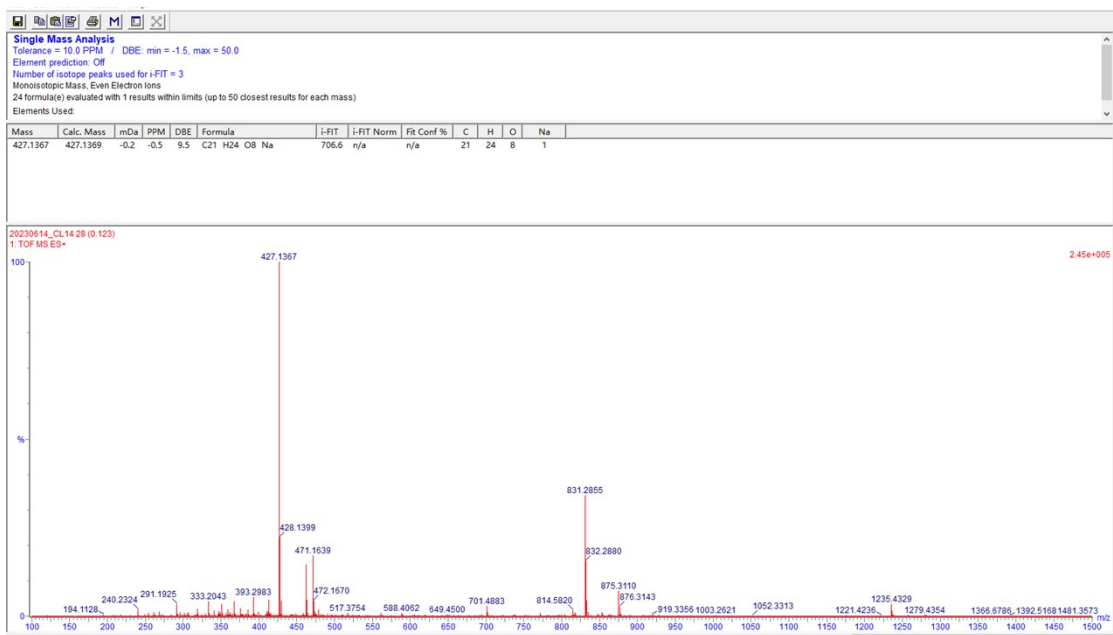

**Figure S7.** HR-ESI-MS spectrum of curvulomycin A (**1**)

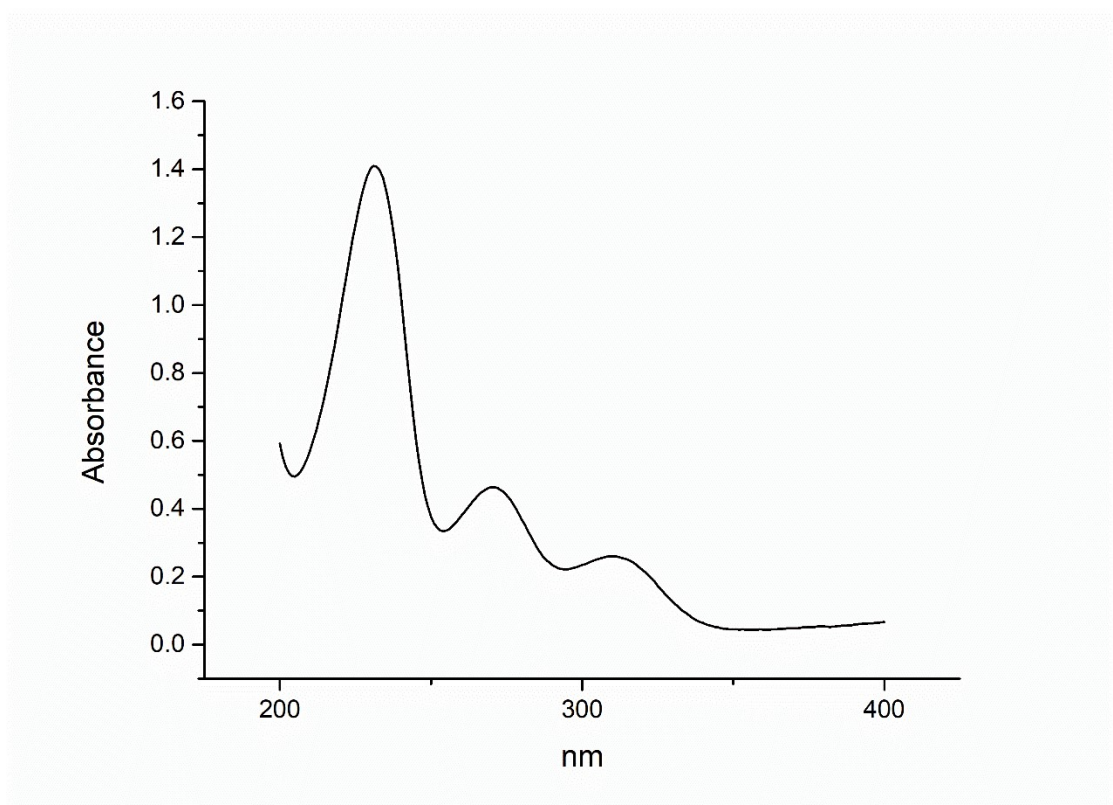

**Figure S8.** UV spectrum of curvulomycin A (**1**)

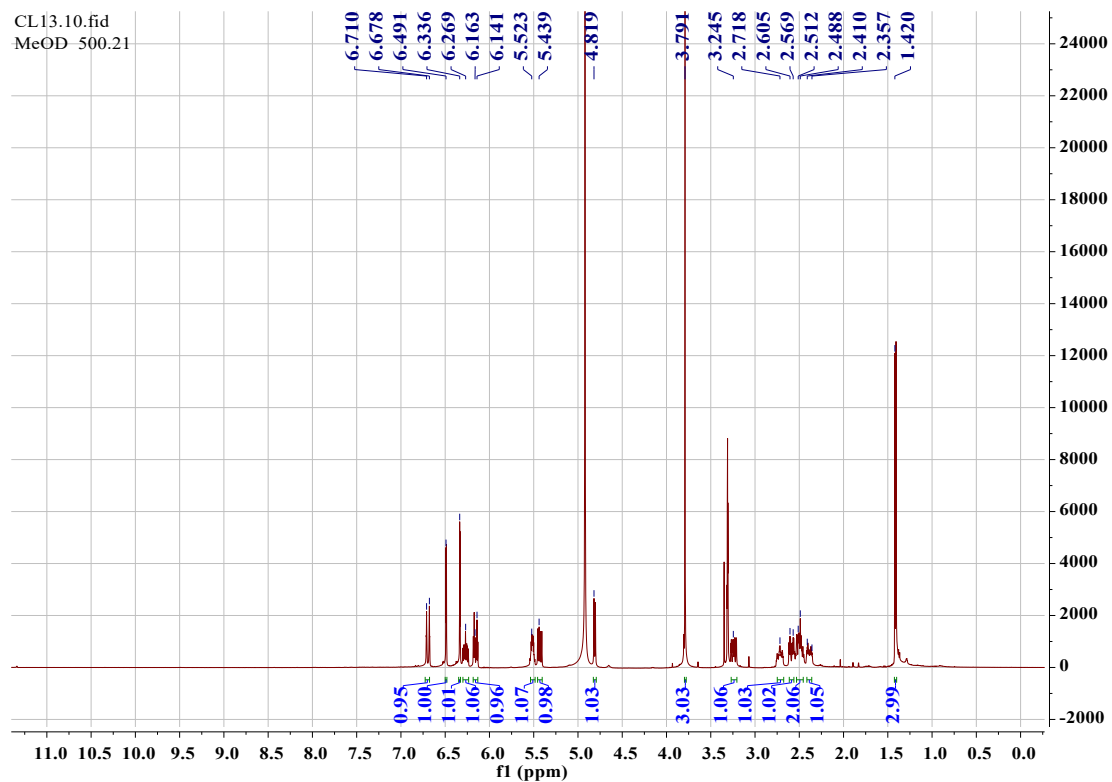

Figure S9.  $^1\text{H}$  NMR spectrum of curvulomycin B (**2**) (500 MHz,  $\text{CD}_3\text{OD}$ )

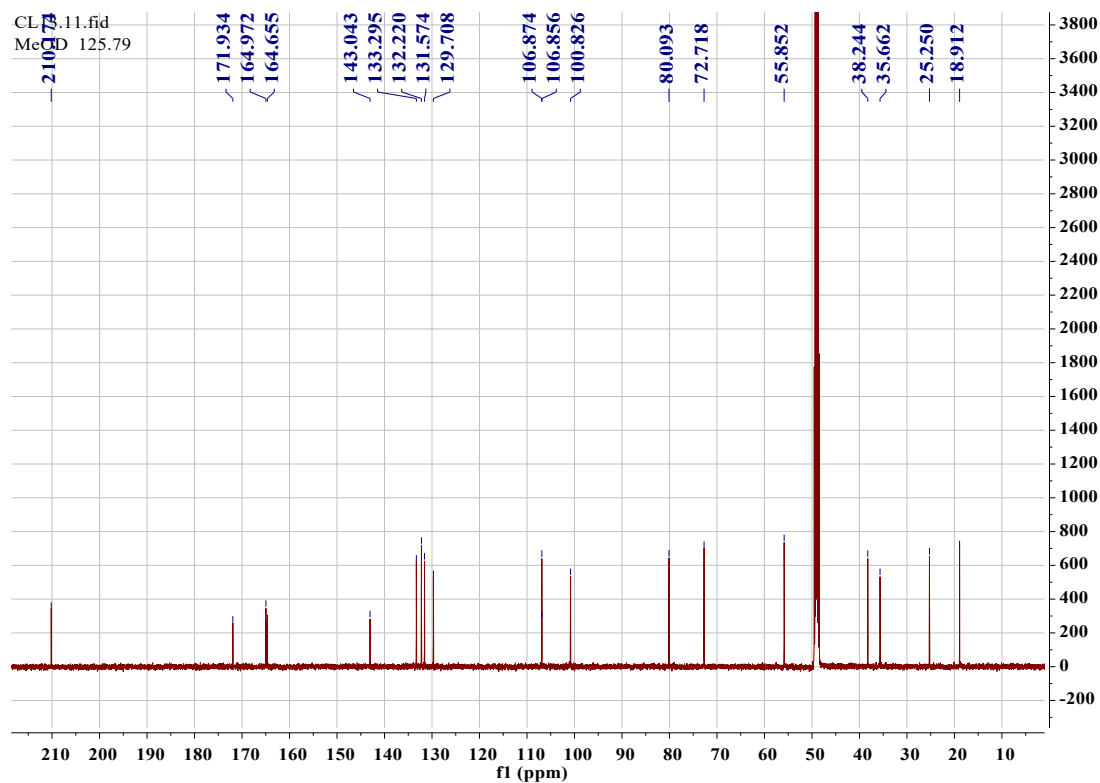

Figure S10.  $^{13}\text{C}$  NMR spectrum of curvulomycin B (**2**) (125 MHz,  $\text{CD}_3\text{OD}$ )



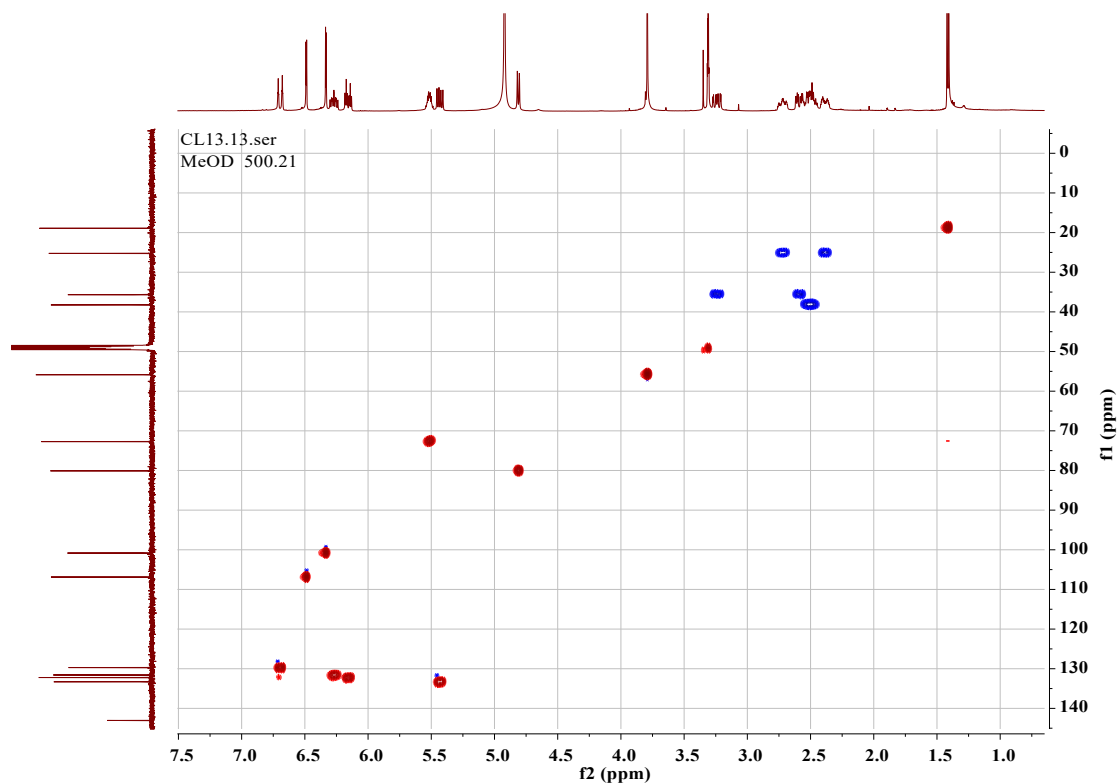

Figure S11. HSQC spectrum of curvulomycin B (2) ( $\text{CD}_3\text{OD}$ )

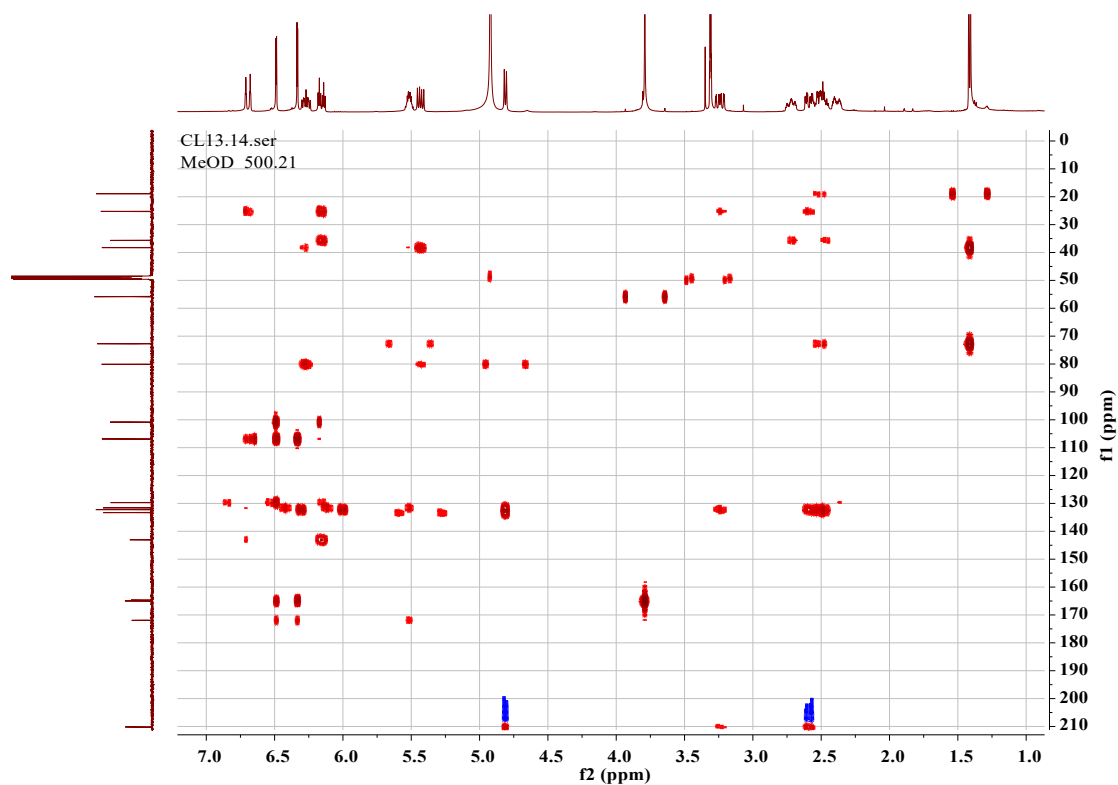

Figure S12. HMBC spectrum of curvulomycin B (2) ( $\text{CD}_3\text{OD}$ )



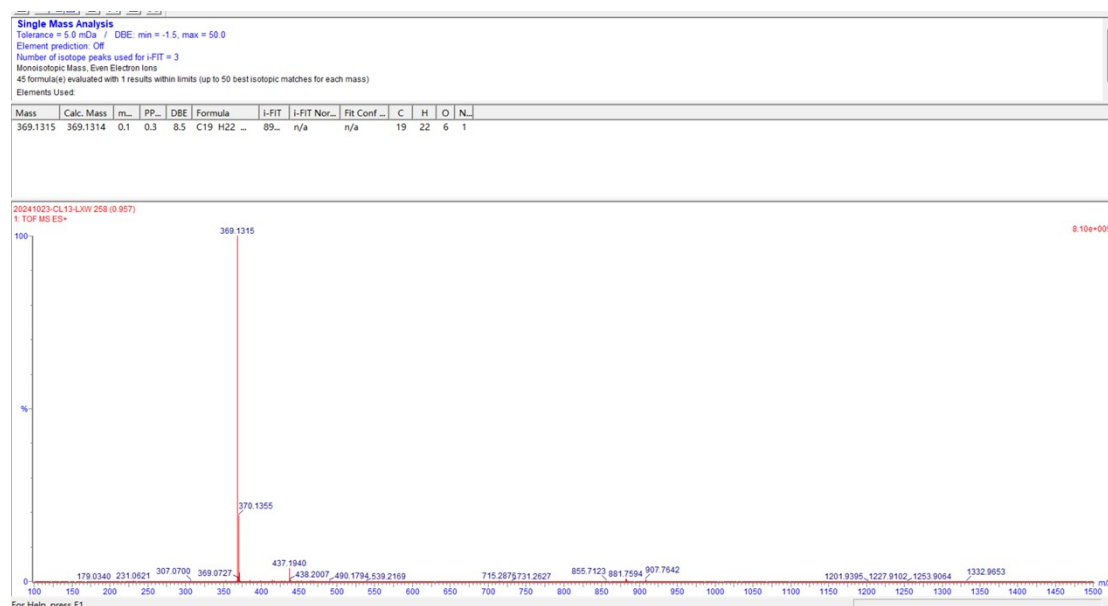

**Figure S15.** HR-ESIMS spectrum of curvulomycin B (2)

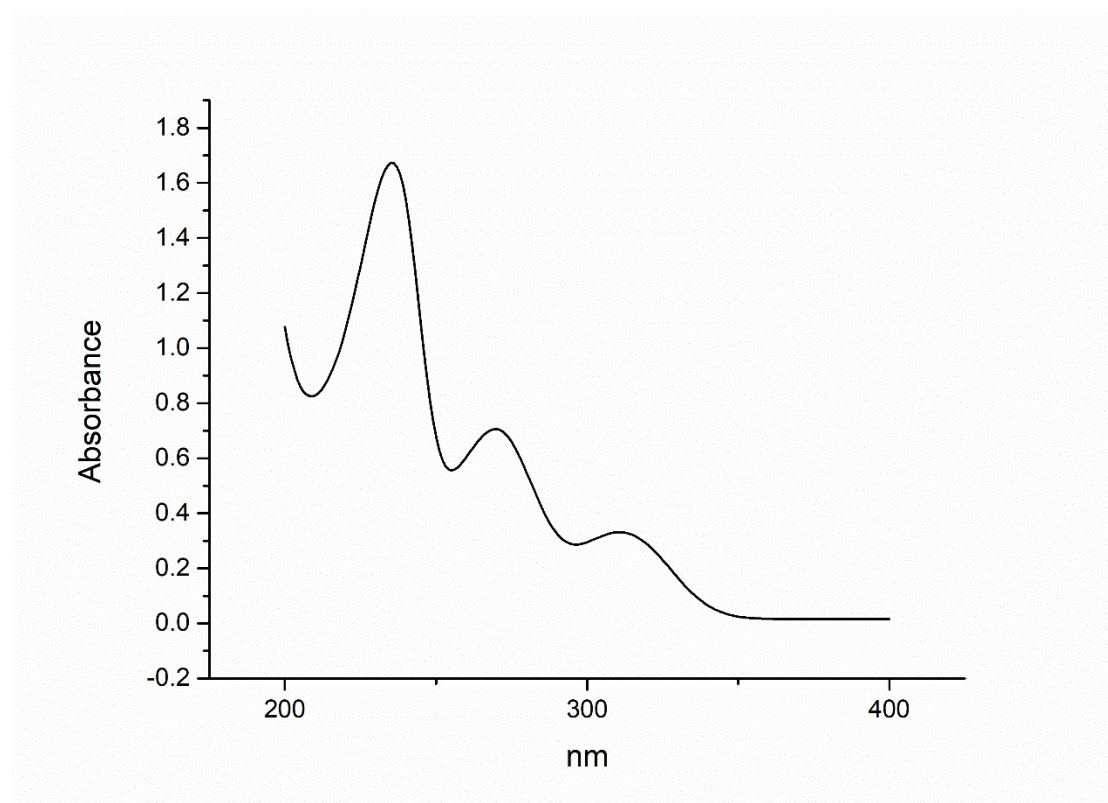

**Figure S16.** UV spectrum of curvulomycin B (2)

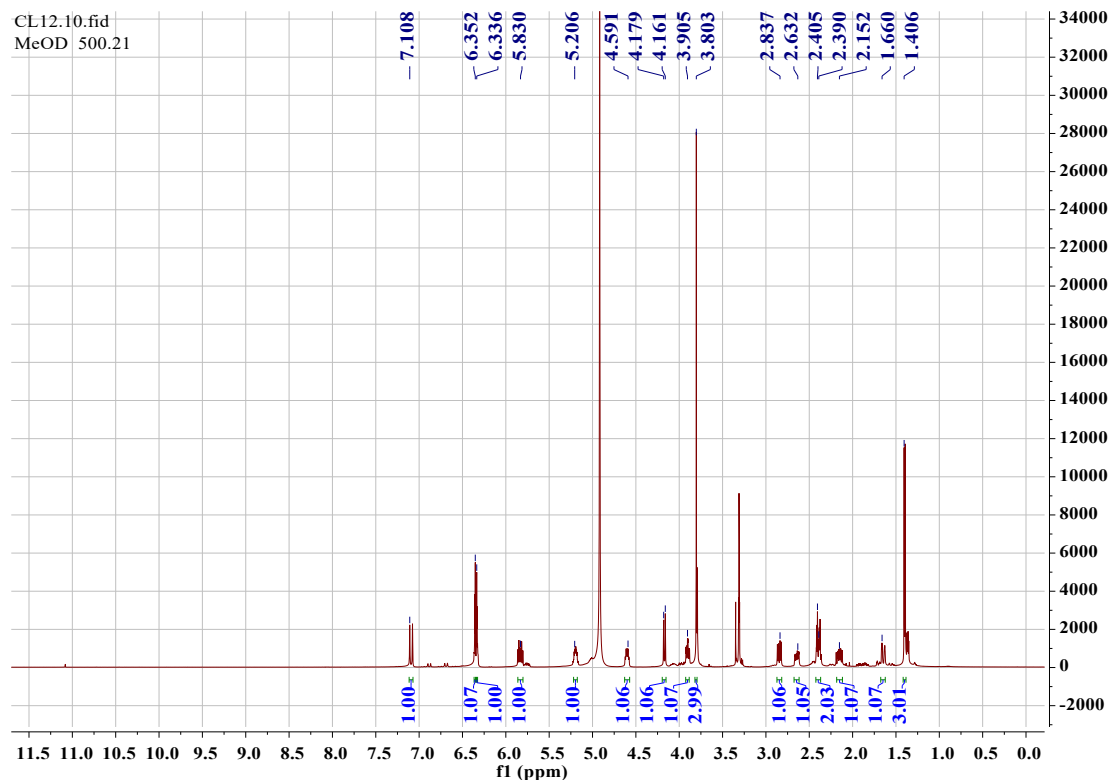

Figure S17.  $^1\text{H}$  NMR spectrum of curvulomycin C (**3**) (500 MHz,  $\text{CD}_3\text{OD}$ )

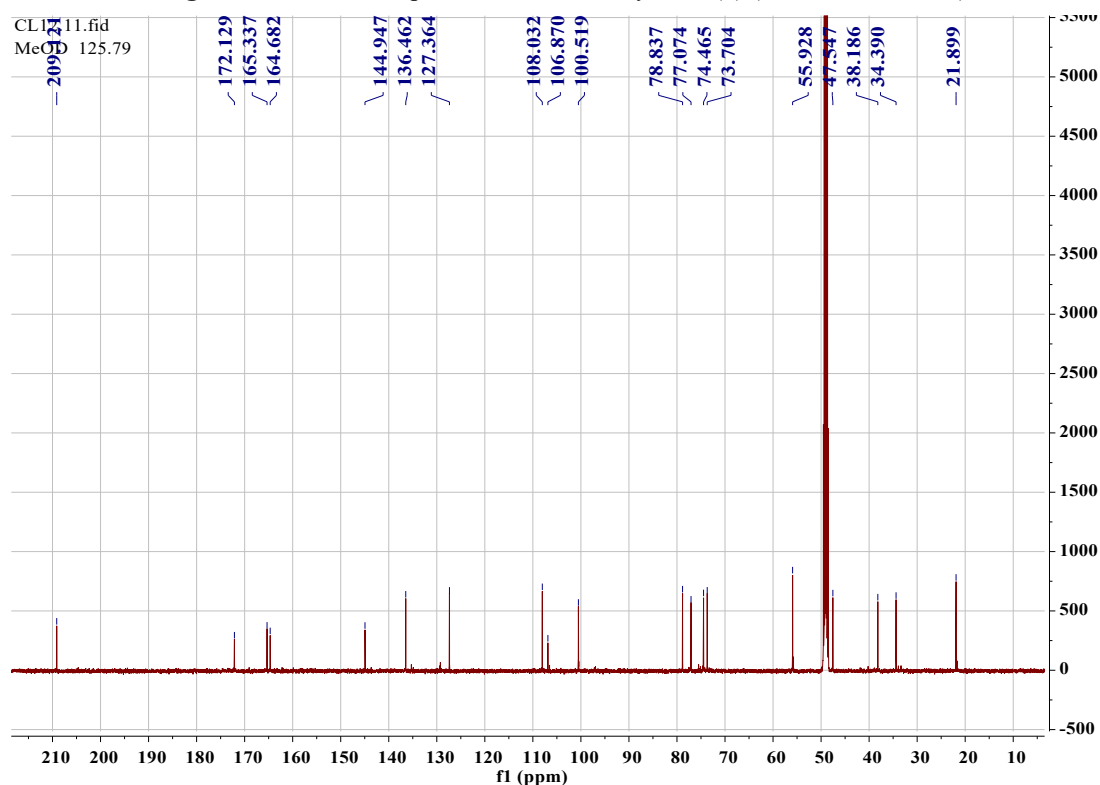

Figure S18.  $^{13}\text{C}$  NMR spectrum of curvulomycin C (**3**) (125 MHz,  $\text{CD}_3\text{OD}$ )

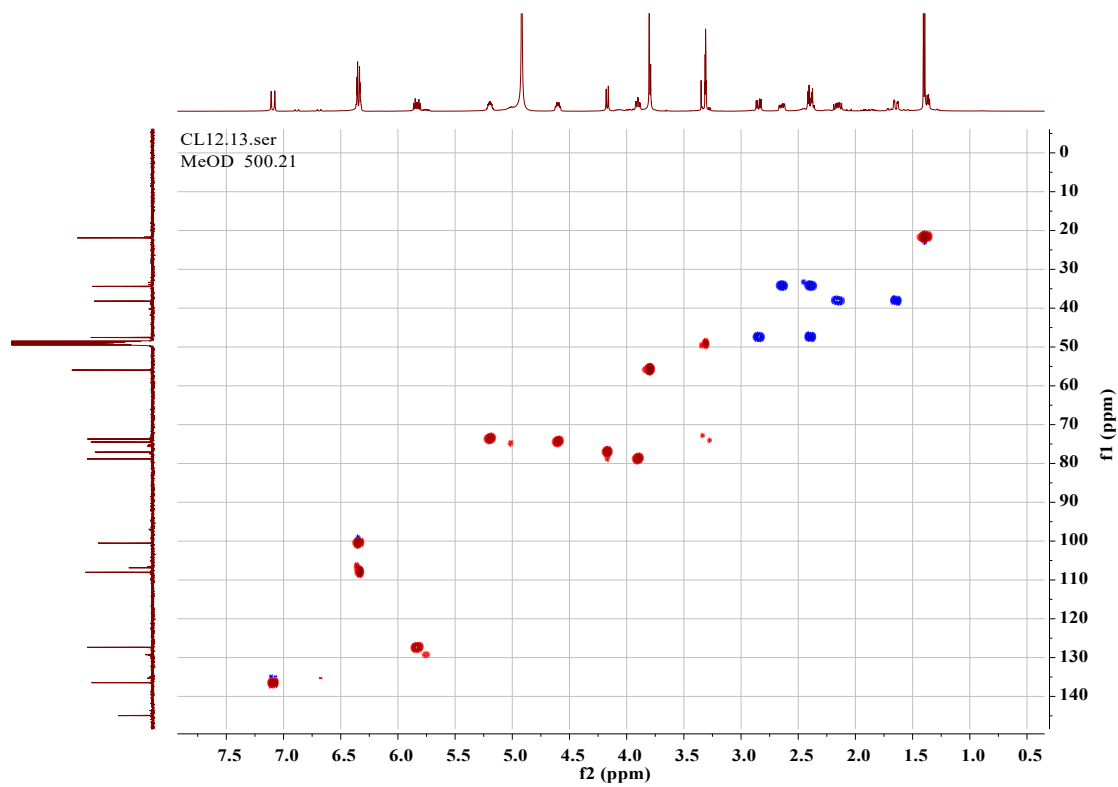

Figure S19. HSQC spectrum of curvulomycin C (**3**) (CD<sub>3</sub>OD)

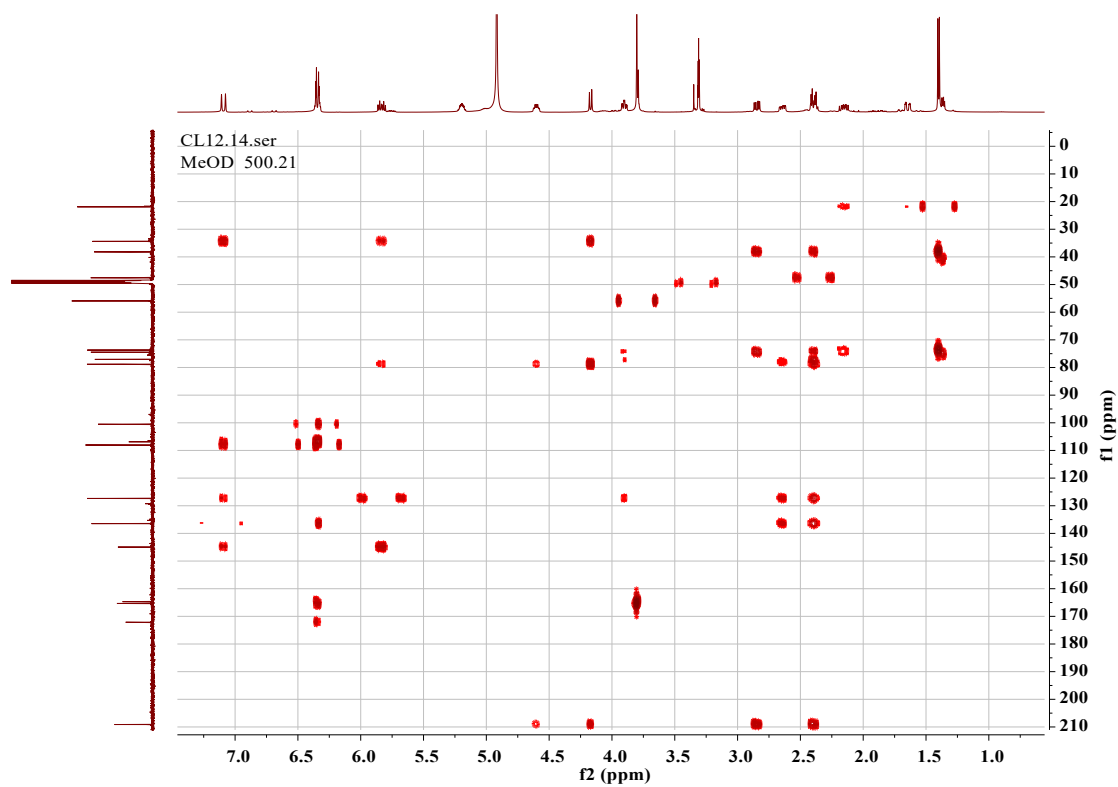

Figure S20. HMBC spectrum of curvulomycin C (**3**) (CD<sub>3</sub>OD)

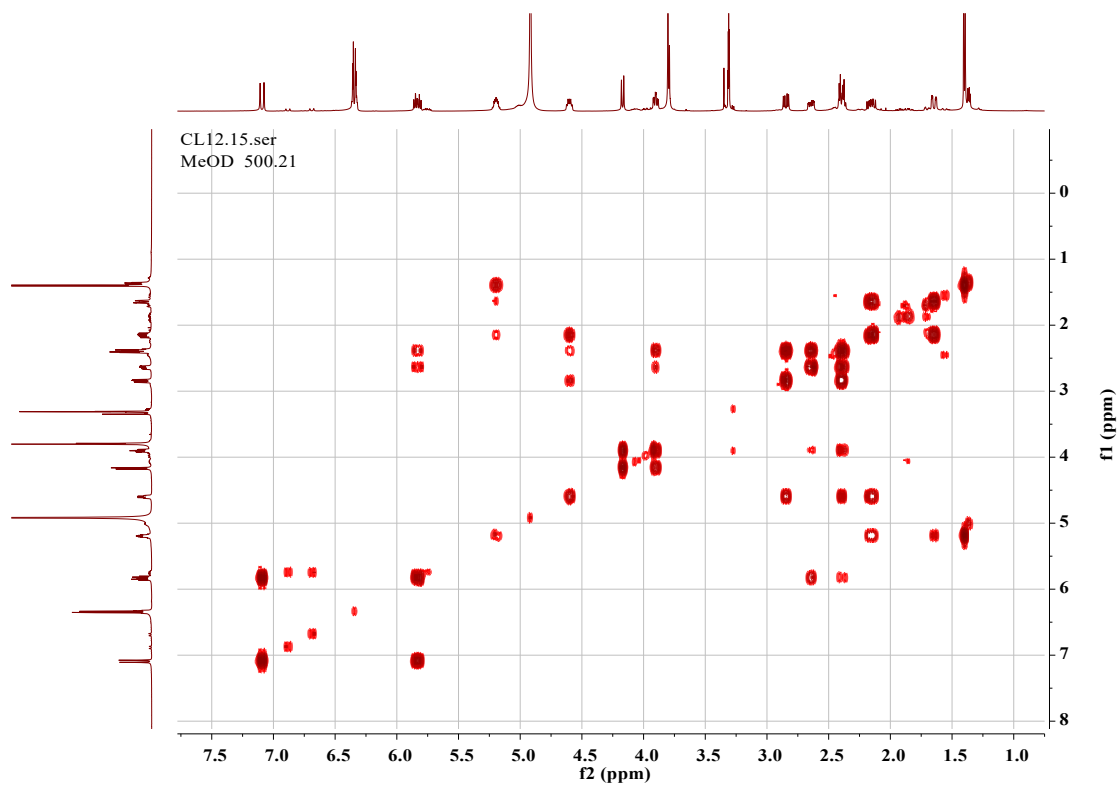

**Figure S21.**  $^1\text{H}$ - $^1\text{H}$  COSY spectrum of curvulomycin C (**3**) ( $\text{CD}_3\text{OD}$ )

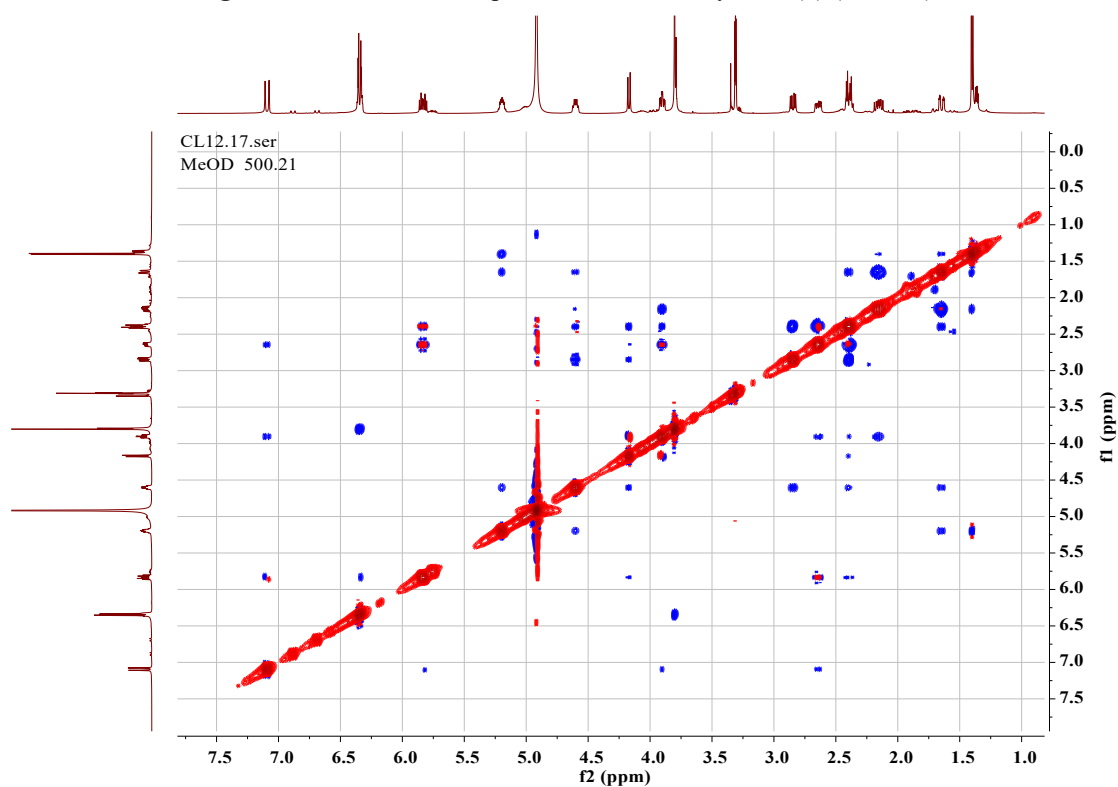

**Figure S22.** NOESY spectrum of curvulomycin C (**3**) ( $\text{CD}_3\text{OD}$ )

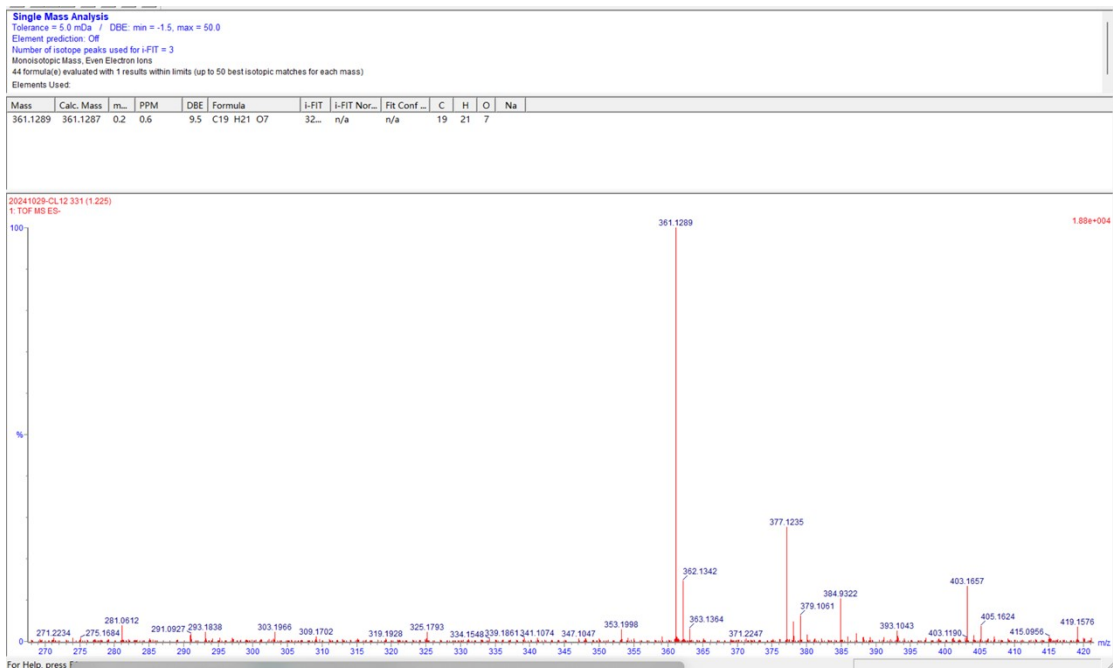

**Figure S23.** HR-ESIMS spectrum of curvulomycin C (**3**)

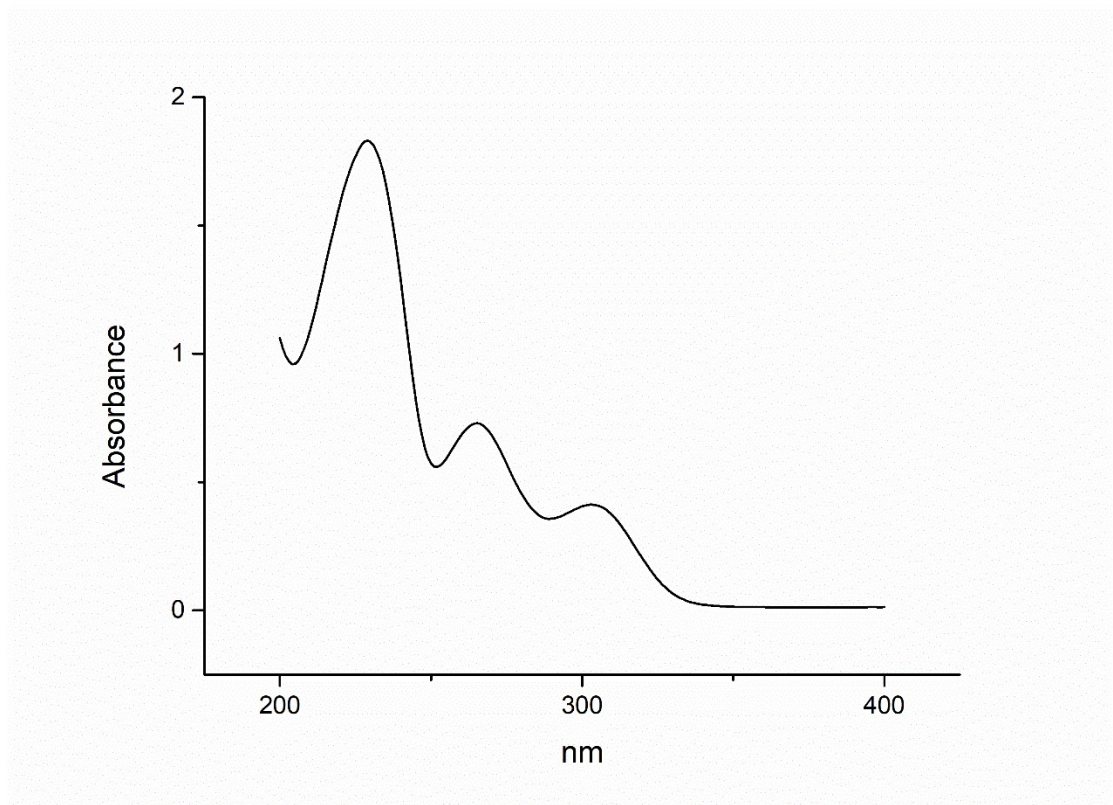

**Figure S24.** UV spectrum of curvulomycin C (**3**)

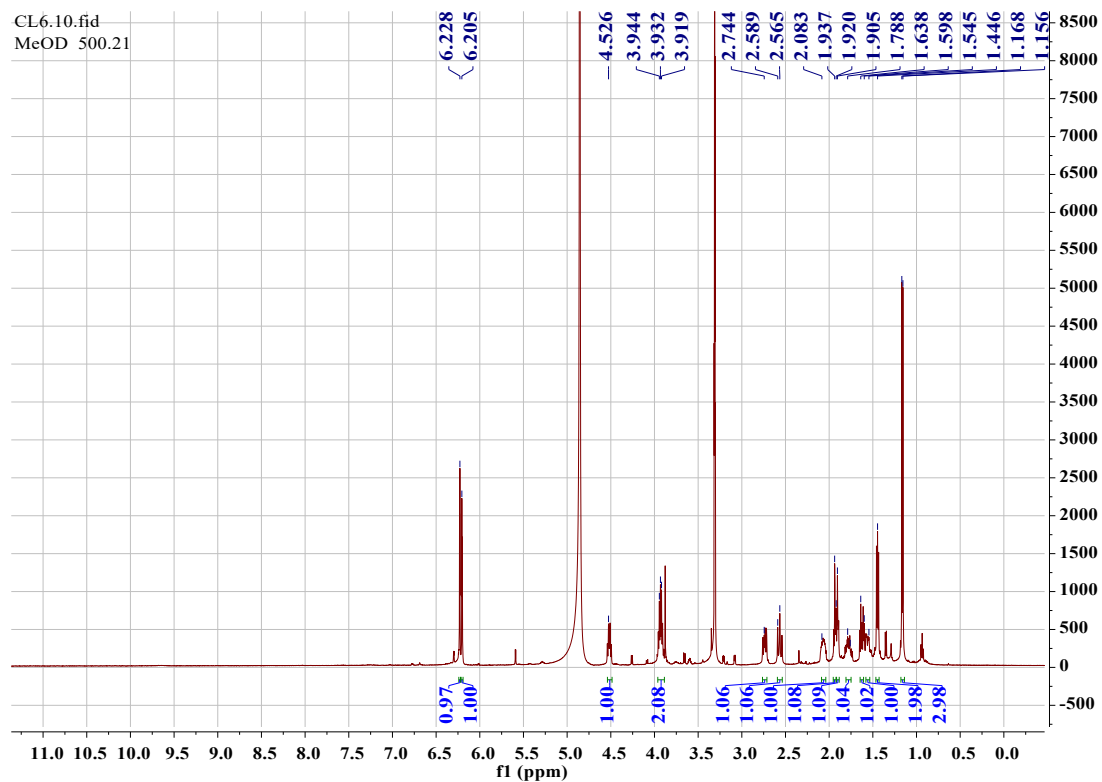

Figure S25.  $^1\text{H}$  NMR spectrum of curvulomycin D (**4**) (500 MHz,  $\text{CD}_3\text{OD}$ )

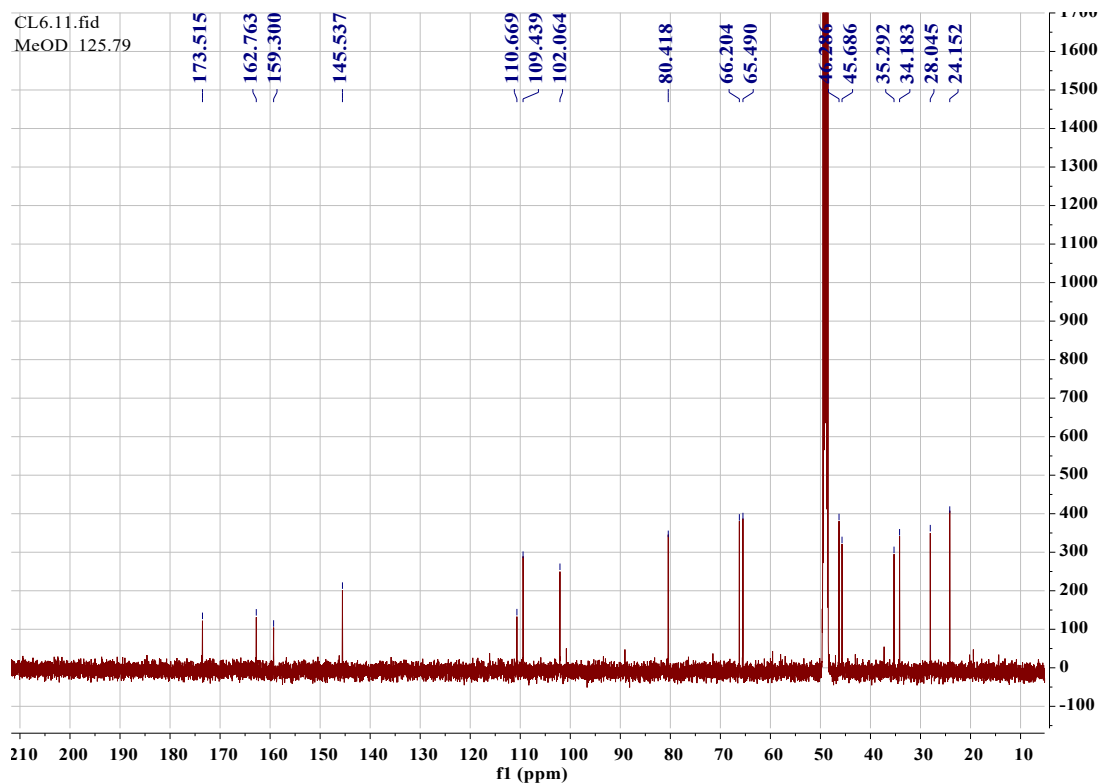

Figure S26.  $^{13}\text{C}$  NMR spectrum of curvulomycin D (**4**) (125 MHz,  $\text{CD}_3\text{OD}$ )



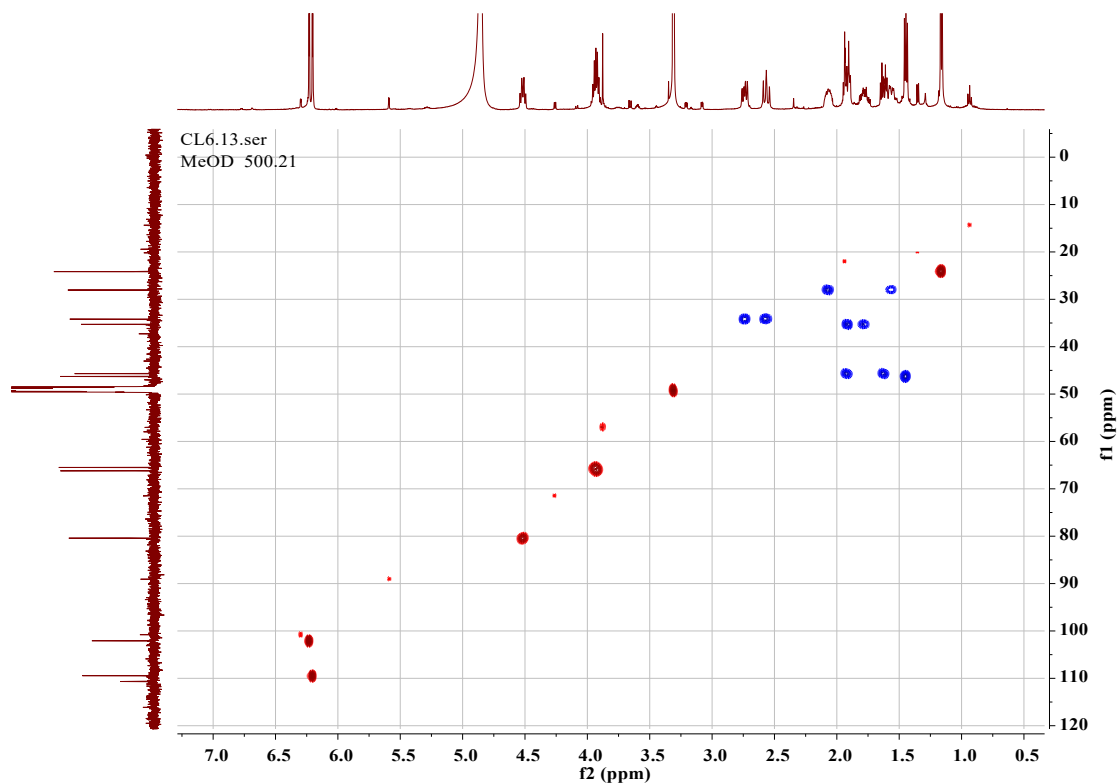

Figure S27. HSQC spectrum of curvulomycin D (4) ( $\text{CD}_3\text{OD}$ )

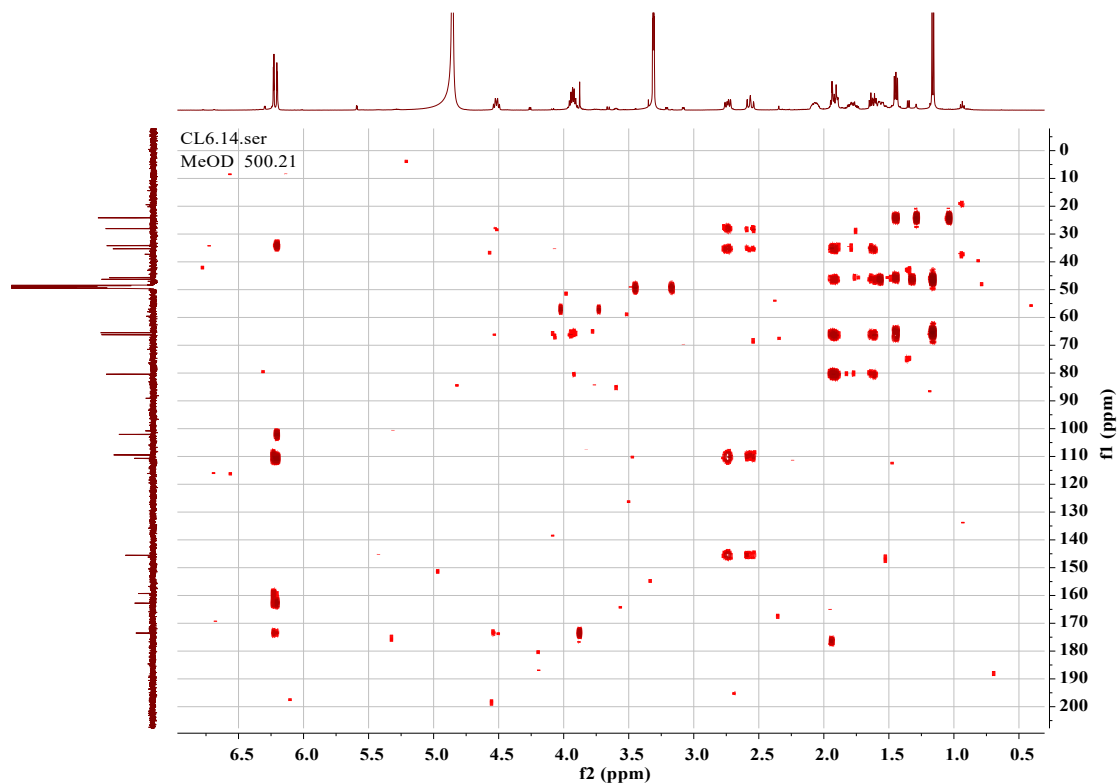

Figure S28. HMBC spectrum of curvulomycin D (4) ( $\text{CD}_3\text{OD}$ )

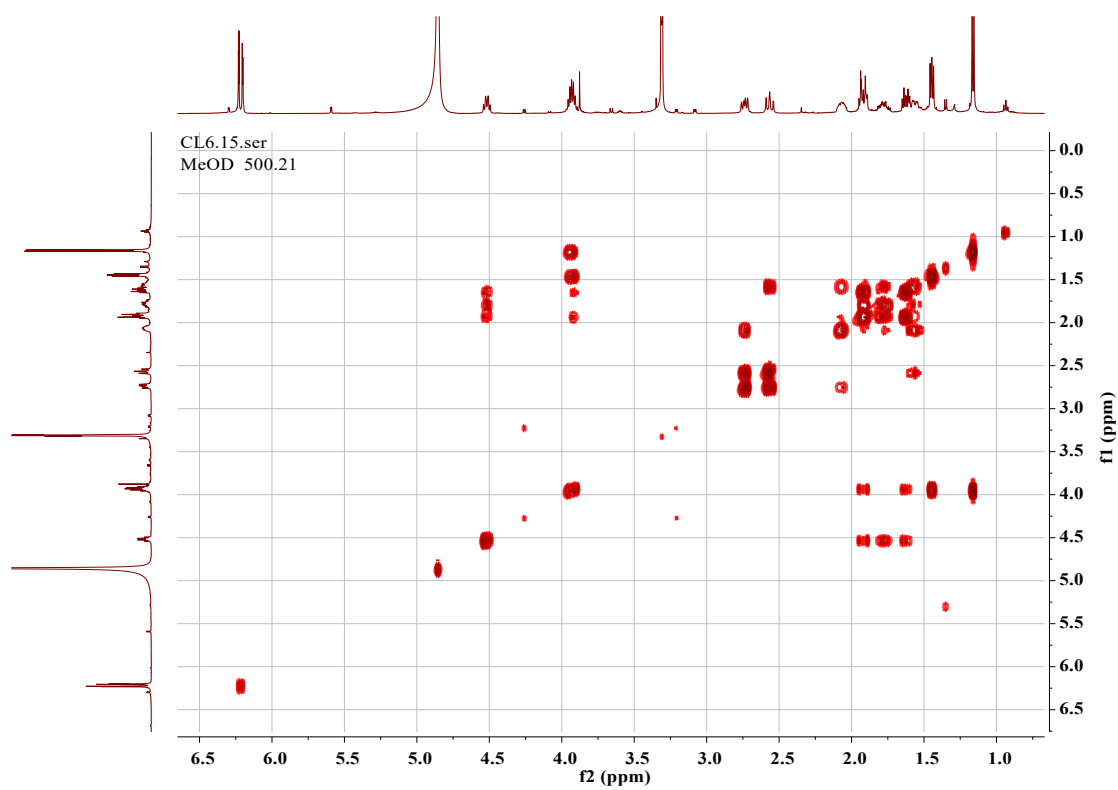

Figure S29.  $^1\text{H}$ - $^1\text{H}$  COSY spectrum of curvulomycin D (4) ( $\text{CD}_3\text{OD}$ )

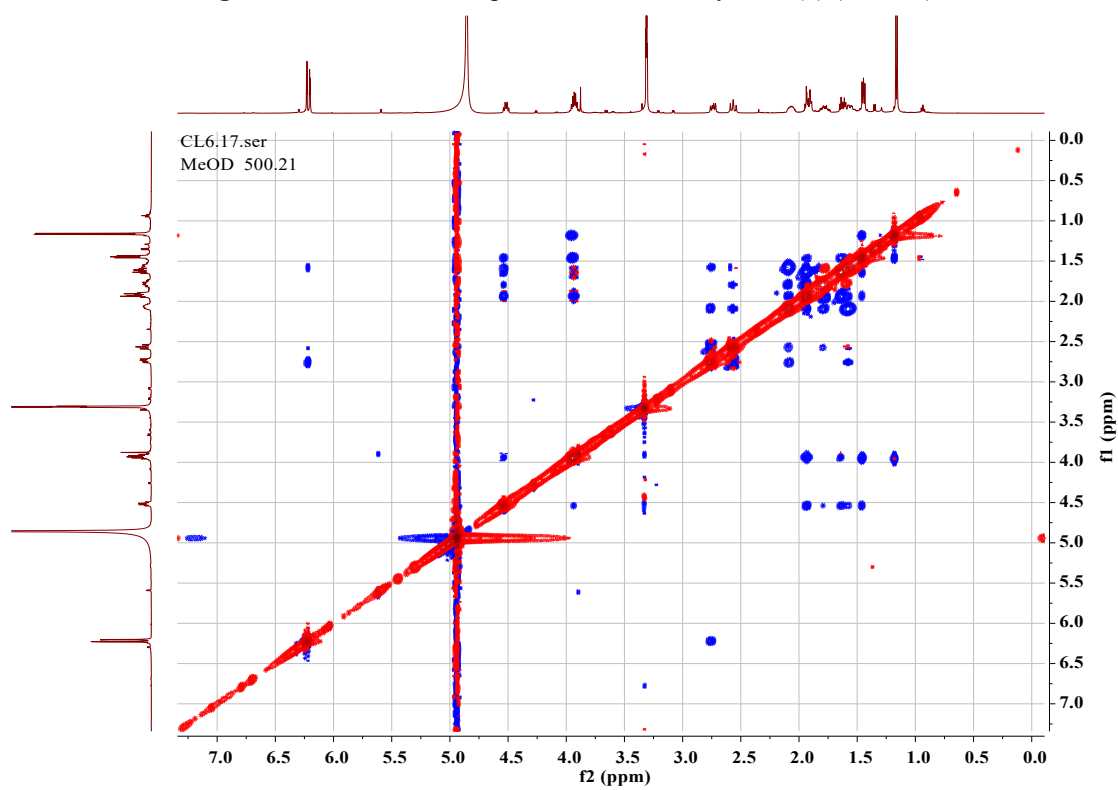

Figure S30. NOESY spectrum of curvulomycin D (4) ( $\text{CD}_3\text{OD}$ )

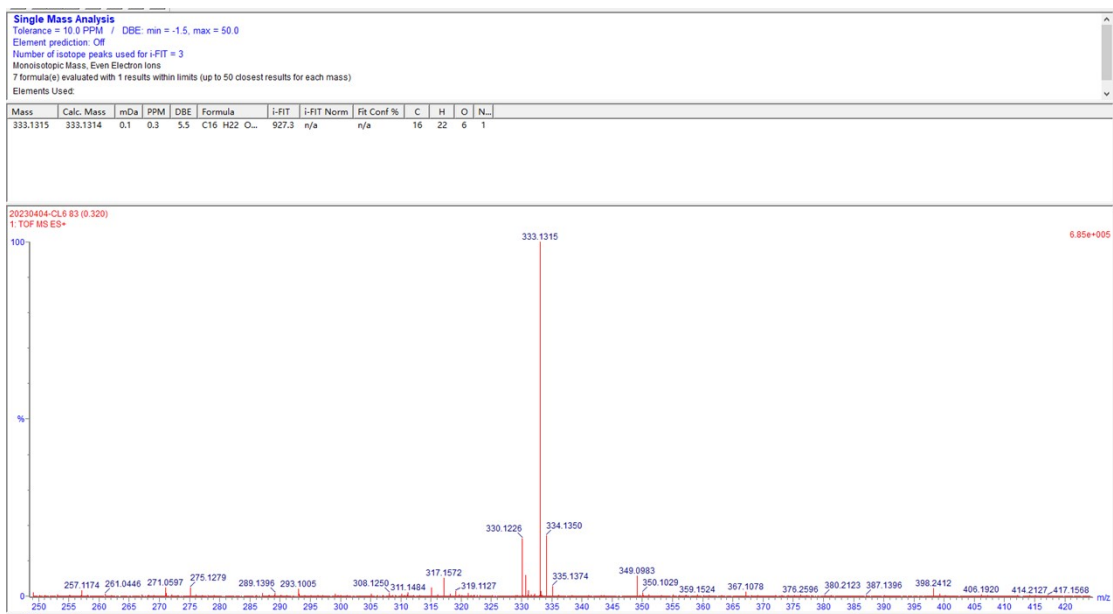

**Figure S31.** HR-ESIMS spectrum of curvulomycin D (4)

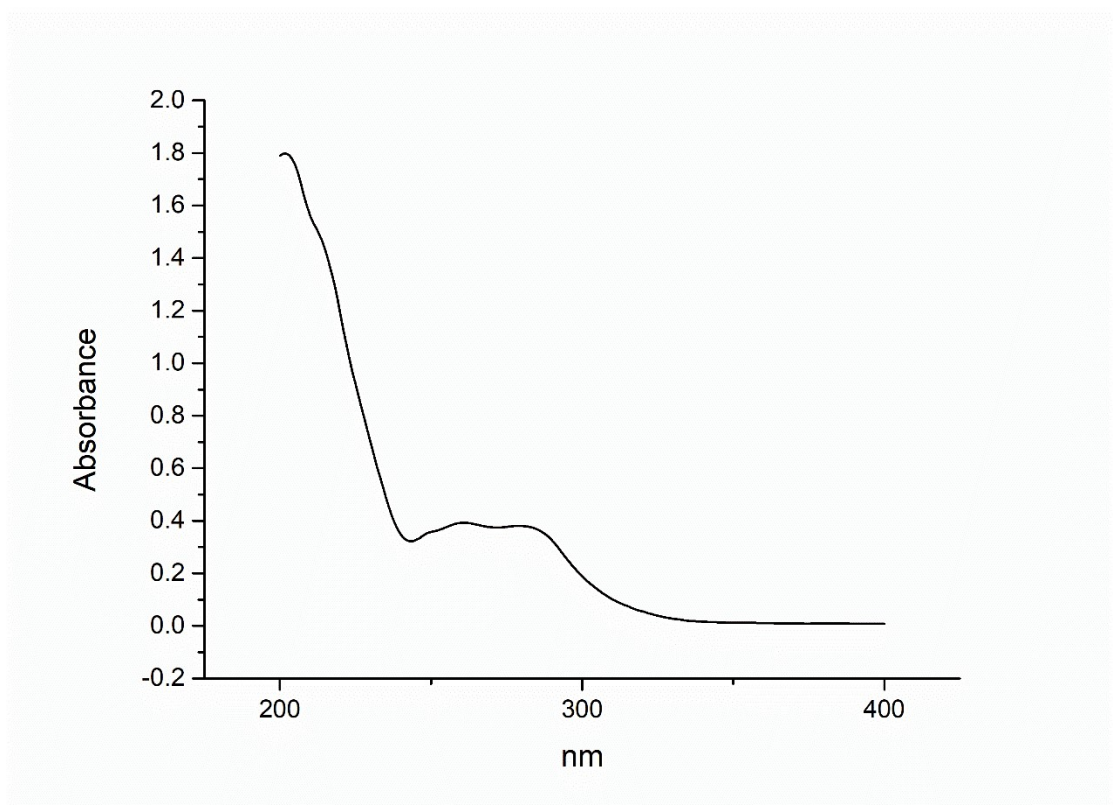

**Figure S32.** UV spectrum of curvulomycin D (4)

**Table S1.** Energies of **1** at MMFF94 force field.

| Conformer | Energy (kJ/mol) | Population (%) |
|-----------|-----------------|----------------|
| 1         | 402.05          | 74.1           |
| 2         | 405.42          | 19.0           |
| 3         | 410.69          | 2.3            |
| 4         | 411.40          | 1.7            |
| 5         | 412.72          | 1.0            |
| 6         | 413.65          | 0.7            |
| 7         | 414.86          | 0.4            |
| 8         | 415.08          | 0.4            |
| 9         | 416.63          | 0.2            |
| 10        | 417.37          | 0.2            |

**Table S2.** Energies of **1** at B3LYP/6-31+g(d) level in methanol.

| Conformer | E (Hartree)   | E (kcal/mol)      | Population (%) |
|-----------|---------------|-------------------|----------------|
| 1         | -1416.9590411 | -889155.967880661 | 57.74          |
| 2         | -1416.9583689 | -889155.546068439 | 28.31          |
| 3         | -1416.9542291 | -889152.948302541 | 0.35           |
| 4         | -1416.9572385 | -889154.836731135 | 8.54           |
| 5         | -1416.9520956 | -889151.609509956 | 0.04           |
| 6         | -1416.9535322 | -889152.510990822 | 0.17           |
| 7         | -1416.9566886 | -889154.491663386 | 4.77           |
| 8         | -1416.9500591 | -889150.331585841 | 0.00           |
| 9         | -1416.9514036 | -889151.175273036 | 0.02           |
| 10        | -1416.9525845 | -889151.916299595 | 0.06           |

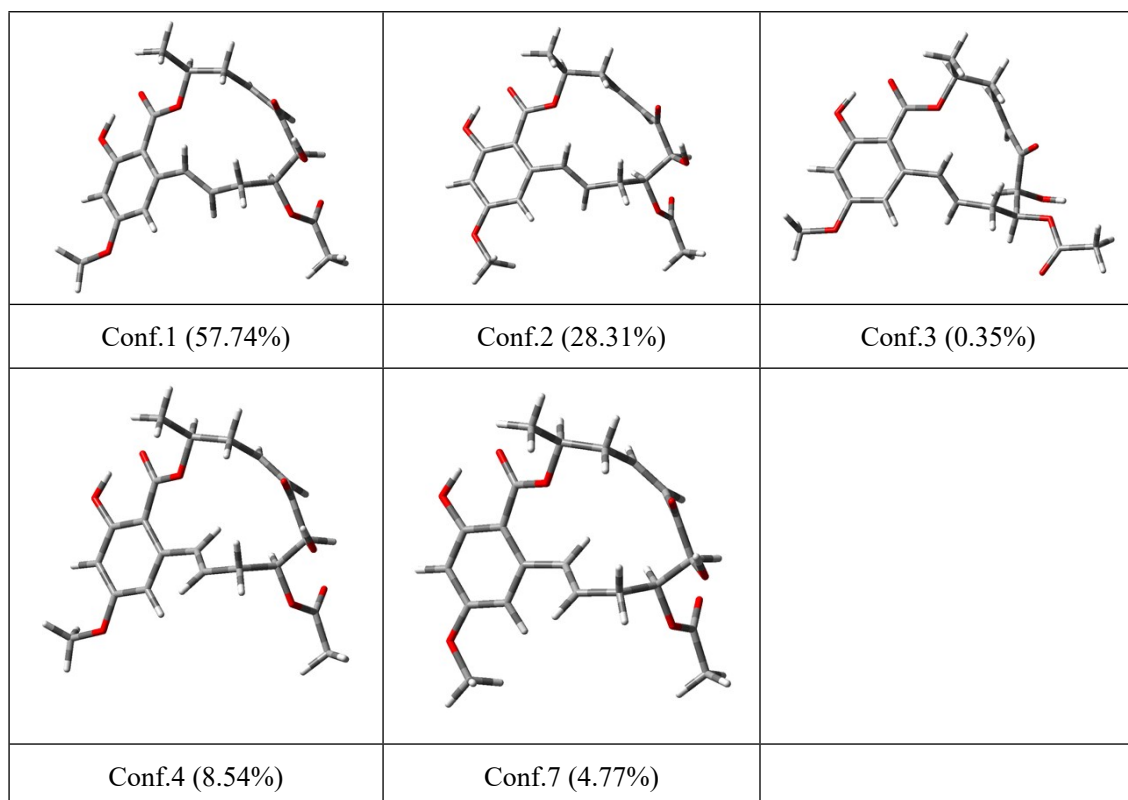

**Figure S33.** The optimized conformers and equilibrium populations of **1**.

**Table S3.** Energies of **2** at MMFF94 force field.

| Configuration                       | Conformer | Energy (kJ/mol) | Population (%) |
|-------------------------------------|-----------|-----------------|----------------|
| (2 <i>S</i> ,6 <i>S</i> )- <b>2</b> | 1         | 346.18          | 46.3           |
| (2 <i>S</i> ,6 <i>S</i> )- <b>2</b> | 2         | 348.67          | 17.0           |
| (2 <i>S</i> ,6 <i>S</i> )- <b>2</b> | 3         | 349.29          | 13.2           |
| (2 <i>S</i> ,6 <i>S</i> )- <b>2</b> | 4         | 351.14          | 6.3            |
| (2 <i>S</i> ,6 <i>S</i> )- <b>2</b> | 5         | 351.91          | 4.6            |
| (2 <i>S</i> ,6 <i>S</i> )- <b>2</b> | 6         | 352.20          | 4.1            |
| (2 <i>S</i> ,6 <i>S</i> )- <b>2</b> | 7         | 352.61          | 3.5            |
| (2 <i>S</i> ,6 <i>S</i> )- <b>2</b> | 8         | 355.11          | 1.3            |
| (2 <i>S</i> ,6 <i>S</i> )- <b>2</b> | 9         | 355.59          | 1.0            |
| (2 <i>S</i> ,6 <i>S</i> )- <b>2</b> | 10        | 355.66          | 1.0            |
| (2 <i>S</i> ,6 <i>R</i> )- <b>2</b> | 1         | 345.69          | 60.7           |
| (2 <i>S</i> ,6 <i>R</i> )- <b>2</b> | 2         | 348.91          | 16.6           |
| (2 <i>S</i> ,6 <i>R</i> )- <b>2</b> | 3         | 350.98          | 7.2            |

|                             |    |        |     |
|-----------------------------|----|--------|-----|
| (2 <i>S</i> ,6 <i>R</i> )-2 | 4  | 352.45 | 4.0 |
| (2 <i>S</i> ,6 <i>R</i> )-2 | 5  | 353.00 | 3.2 |
| (2 <i>S</i> ,6 <i>R</i> )-2 | 6  | 354.21 | 2.0 |
| (2 <i>S</i> ,6 <i>R</i> )-2 | 7  | 354.26 | 1.9 |
| (2 <i>S</i> ,6 <i>R</i> )-2 | 8  | 356.92 | 0.7 |
| (2 <i>S</i> ,6 <i>R</i> )-2 | 9  | 357.68 | 0.5 |
| (2 <i>S</i> ,6 <i>R</i> )-2 | 10 | 357.75 | 0.5 |

**Table S4.** Energies of **2** at B3LYP/6-31+g(d) level in methanol.

| Configuration               | Conformer | E (Hartree)   | E (kcal/mol)      | Population (%) |
|-----------------------------|-----------|---------------|-------------------|----------------|
| (2 <i>S</i> ,6 <i>S</i> )-2 | 1         | -1188.9984326 | -746108.406440826 | 52.20          |
| (2 <i>S</i> ,6 <i>S</i> )-2 | 2         | -1188.9953884 | -746106.496174884 | 2.07           |
| (2 <i>S</i> ,6 <i>S</i> )-2 | 3         | -1188.99778   | -746107.9969278   | 26.13          |
| (2 <i>S</i> ,6 <i>S</i> )-2 | 4         | -1188.9969369 | -746107.467874119 | 10.69          |
| (2 <i>S</i> ,6 <i>S</i> )-2 | 5         | -1188.9876645 | -746101.649350395 | 0.00           |
| (2 <i>S</i> ,6 <i>S</i> )-2 | 6         | -1188.9950427 | -746106.279244677 | 1.44           |
| (2 <i>S</i> ,6 <i>S</i> )-2 | 7         | -1188.9948419 | -746106.153240669 | 1.16           |
| (2 <i>S</i> ,6 <i>S</i> )-2 | 8         | -1188.996322  | -746107.08201822  | 5.57           |
| (2 <i>S</i> ,6 <i>S</i> )-2 | 9         | -1188.9873343 | -746101.442146593 | 0.00           |
| (2 <i>S</i> ,6 <i>S</i> )-2 | 10        | -1188.9944116 | -746105.883223116 | 0.74           |
| (2 <i>S</i> ,6 <i>R</i> )-2 | 1         | -1188.9960827 | -746106.931855077 | 52.97          |
| (2 <i>S</i> ,6 <i>R</i> )-2 | 2         | -1188.9954523 | -746106.536272773 | 27.15          |
| (2 <i>S</i> ,6 <i>R</i> )-2 | 3         | -1188.9917733 | -746104.227663483 | 0.55           |
| (2 <i>S</i> ,6 <i>R</i> )-2 | 4         | -1188.9913124 | -746103.938444124 | 0.34           |
| (2 <i>S</i> ,6 <i>R</i> )-2 | 5         | -1188.9901694 | -746103.221200194 | 0.10           |
| (2 <i>S</i> ,6 <i>R</i> )-2 | 6         | -1188.9942583 | -746105.787025833 | 7.66           |
| (2 <i>S</i> ,6 <i>R</i> )-2 | 7         | -1188.993209  | -746105.12857959  | 2.52           |
| (2 <i>S</i> ,6 <i>R</i> )-2 | 8         | -1188.9936112 | -746105.380964112 | 3.86           |
| (2 <i>S</i> ,6 <i>R</i> )-2 | 9         | -1188.9925838 | -746104.736260338 | 1.30           |

(2*S*,6*S*)-2

|                                                                                     |                                                                                     |                                                                                     |
|-------------------------------------------------------------------------------------|-------------------------------------------------------------------------------------|-------------------------------------------------------------------------------------|
| 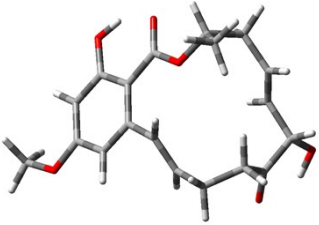   |    |  |
| Conf.1 (52.20%)                                                                     | Conf.2 (2.07%)                                                                      | Conf.3 (26.13%)                                                                     |
|    |    |  |
| Conf.4 (10.69%)                                                                     | Conf.6 (1.44%)                                                                      | Conf.7 (1.16%)                                                                      |
|  |  |                                                                                     |
| Conf.8 (5.57%)                                                                      | Conf.10 (0.74%)                                                                     |                                                                                     |

(2*S*,6*R*)-2

|                                                                                     |                                                                                     |                                                                                      |
|-------------------------------------------------------------------------------------|-------------------------------------------------------------------------------------|--------------------------------------------------------------------------------------|
| 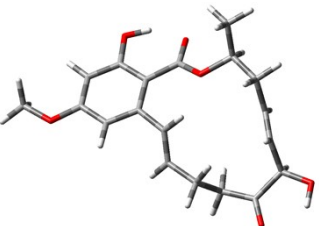 |  |  |
| Conf.1 (52.97%)                                                                     | Conf.2 (27.15%)                                                                     | Conf.3 (0.55%)                                                                       |
|  |  |  |

|                                                                                   |                                                                                   |                                                                                     |
|-----------------------------------------------------------------------------------|-----------------------------------------------------------------------------------|-------------------------------------------------------------------------------------|
| Conf.4 (0.34%)                                                                    | Conf.5 (0.10%)                                                                    | Conf.6 (7.66%)                                                                      |
| 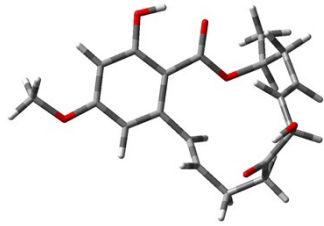 |  |  |
| Conf.7 (2.52%)                                                                    | Conf.8 (3.86%)                                                                    | Conf.9 (1.30%)                                                                      |
|  |                                                                                   |                                                                                     |
| Conf.10 (3.57%)                                                                   |                                                                                   |                                                                                     |

**Figure S34.** The optimized conformers and equilibrium populations of **2**.

**Table S5.** Energies of **3** at MMFF94 force field.

| Configuration                                               | Conformer | Energy (kJ/mol) | Population (%) |
|-------------------------------------------------------------|-----------|-----------------|----------------|
| (2 <i>S</i> ,4 <i>S</i> ,7 <i>S</i> ,8 <i>S</i> )- <b>3</b> | 1         | 384.20          | 73.5           |
| (2 <i>S</i> ,4 <i>S</i> ,7 <i>S</i> ,8 <i>S</i> )- <b>3</b> | 2         | 386.75          | 26.3           |
| (2 <i>S</i> ,4 <i>S</i> ,7 <i>S</i> ,8 <i>S</i> )- <b>3</b> | 3         | 401.03          | 0.1            |
| (2 <i>S</i> ,4 <i>S</i> ,7 <i>S</i> ,8 <i>S</i> )- <b>3</b> | 4         | 403.46          | 0.0            |
| (2 <i>S</i> ,4 <i>S</i> ,7 <i>S</i> ,8 <i>S</i> )- <b>3</b> | 5         | 404.07          | 0.0            |
| (2 <i>S</i> ,4 <i>R</i> ,7 <i>R</i> ,8 <i>R</i> )- <b>3</b> | 1         | 391.59          | 49.1           |
| (2 <i>S</i> ,4 <i>R</i> ,7 <i>R</i> ,8 <i>R</i> )- <b>3</b> | 2         | 393.47          | 22.9           |
| (2 <i>S</i> ,4 <i>R</i> ,7 <i>R</i> ,8 <i>R</i> )- <b>3</b> | 3         | 394.40          | 15.8           |
| (2 <i>S</i> ,4 <i>R</i> ,7 <i>R</i> ,8 <i>R</i> )- <b>3</b> | 4         | 396.21          | 7.6            |
| (2 <i>S</i> ,4 <i>R</i> ,7 <i>R</i> ,8 <i>R</i> )- <b>3</b> | 5         | 398.86          | 2.6            |
| (2 <i>S</i> ,4 <i>R</i> ,7 <i>R</i> ,8 <i>R</i> )- <b>3</b> | 6         | 401.71          | 0.8            |
| (2 <i>S</i> ,4 <i>R</i> ,7 <i>R</i> ,8 <i>R</i> )- <b>3</b> | 7         | 404.57          | 0.3            |



**Table S6.** Energies of **3** at B3LYP/6-31+g(d) level in methanol.

| Configuration                                               | Conformer | E (Hartree)   | E (kcal/mol)      | Population (%) |
|-------------------------------------------------------------|-----------|---------------|-------------------|----------------|
| (2 <i>S</i> ,4 <i>S</i> ,7 <i>S</i> ,8 <i>S</i> )- <b>3</b> | 1         | -1264.2557302 | -793333.113257802 | 60.31          |
| (2 <i>S</i> ,4 <i>S</i> ,7 <i>S</i> ,8 <i>S</i> )- <b>3</b> | 2         | -1264.2552559 | -793332.815629809 | 36.48          |
| (2 <i>S</i> ,4 <i>S</i> ,7 <i>S</i> ,8 <i>S</i> )- <b>3</b> | 3         | -1264.2528249 | -793331.290152999 | 2.77           |
| (2 <i>S</i> ,4 <i>S</i> ,7 <i>S</i> ,8 <i>S</i> )- <b>3</b> | 4         | -1264.2510894 | -793330.201109394 | 0.44           |
| (2 <i>S</i> ,4 <i>S</i> ,7 <i>S</i> ,8 <i>S</i> )- <b>3</b> | 5         | -1264.2469321 | -793327.592362071 | 0.01           |
| (2 <i>S</i> ,4 <i>R</i> ,7 <i>R</i> ,8 <i>R</i> )- <b>3</b> | 1         | -1264.2559161 | -793333.229911911 | 61.37          |
| (2 <i>S</i> ,4 <i>R</i> ,7 <i>R</i> ,8 <i>R</i> )- <b>3</b> | 2         | -1264.2529505 | -793331.368968255 | 2.65           |
| (2 <i>S</i> ,4 <i>R</i> ,7 <i>R</i> ,8 <i>R</i> )- <b>3</b> | 3         | -1264.2553502 | -793332.874804002 | 33.68          |
| (2 <i>S</i> ,4 <i>R</i> ,7 <i>R</i> ,8 <i>R</i> )- <b>3</b> | 4         | -1264.2522876 | -793330.952991876 | 1.31           |
| (2 <i>S</i> ,4 <i>R</i> ,7 <i>R</i> ,8 <i>R</i> )- <b>3</b> | 5         | -1264.2491383 | -793328.976774633 | 0.05           |
| (2 <i>S</i> ,4 <i>R</i> ,7 <i>R</i> ,8 <i>R</i> )- <b>3</b> | 6         | -1264.2488024 | -793328.765994024 | 0.03           |
| (2 <i>S</i> ,4 <i>R</i> ,7 <i>R</i> ,8 <i>R</i> )- <b>3</b> | 7         | -1264.2519429 | -793330.736689179 | 0.91           |

(2*S*,4*S*,7*S*,8*S*)-**3**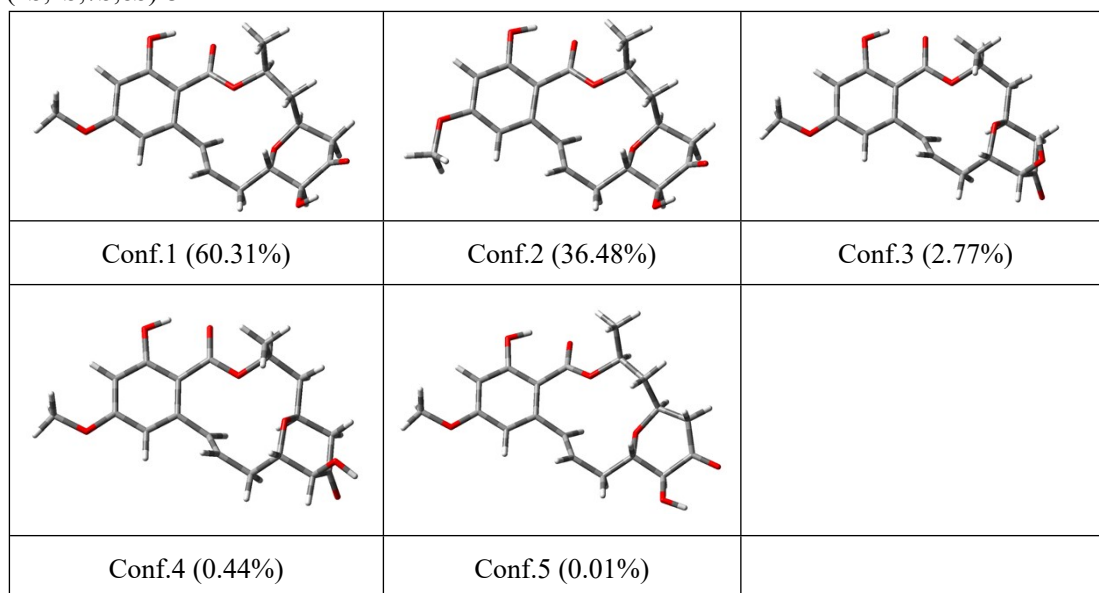(2*S*,4*R*,7*R*,8*R*)-**3**

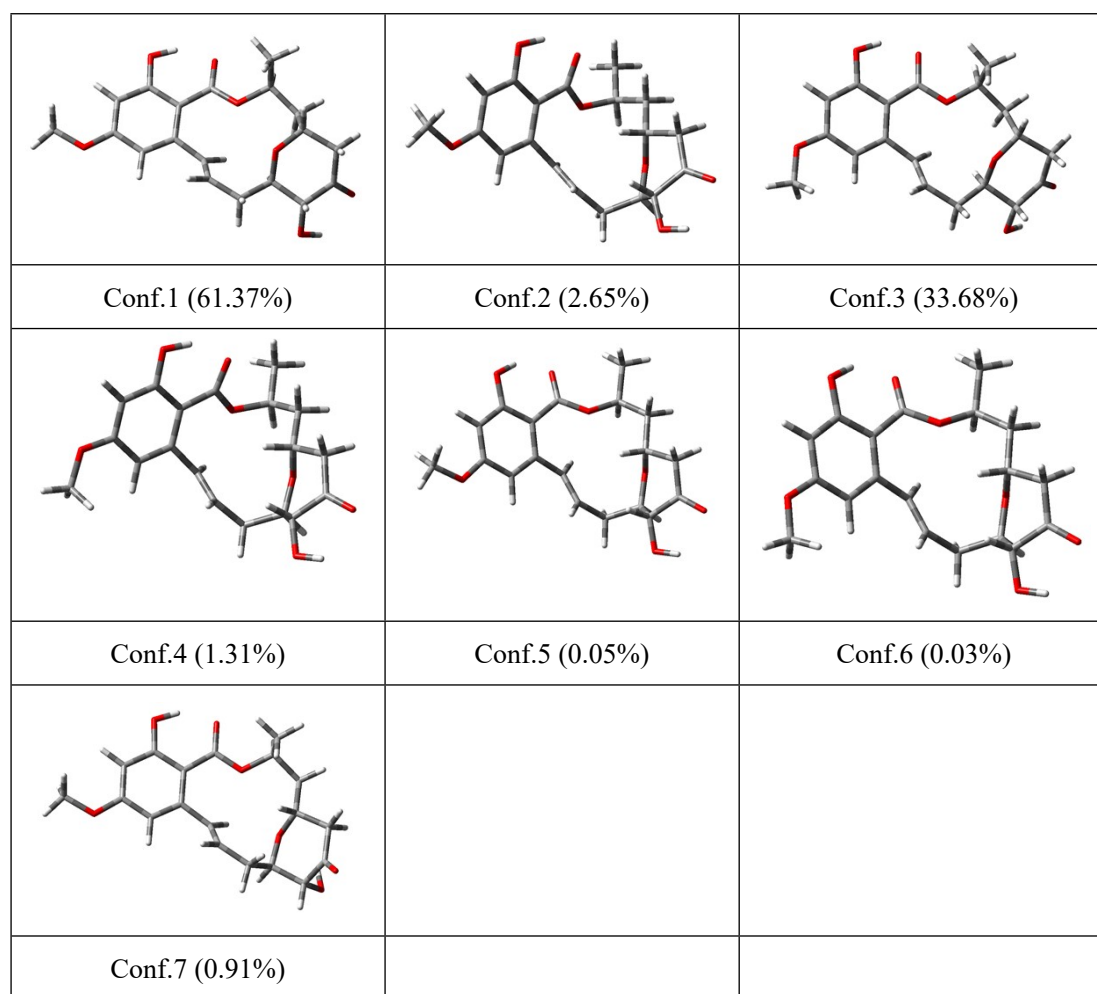

**Figure S35.** The optimized conformers and equilibrium populations of **3**.

**Table S7.** Energies of **4** at MMFF94 force field.

| Configuration                                     | Conformer | Energy (kJ/mol) | Population (%) |
|---------------------------------------------------|-----------|-----------------|----------------|
| (4 <i>R</i> , 6 <i>S</i> , 8 <i>S</i> )- <b>4</b> | 1         | 180.45          | 47.3           |
| (4 <i>R</i> , 6 <i>S</i> , 8 <i>S</i> )- <b>4</b> | 2         | 183.06          | 16.5           |
| (4 <i>R</i> , 6 <i>S</i> , 8 <i>S</i> )- <b>4</b> | 3         | 183.28          | 15.1           |
| (4 <i>R</i> , 6 <i>S</i> , 8 <i>S</i> )- <b>4</b> | 4         | 183.95          | 11.5           |
| (4 <i>R</i> , 6 <i>S</i> , 8 <i>S</i> )- <b>4</b> | 5         | 187.62          | 2.6            |
| (4 <i>R</i> , 6 <i>S</i> , 8 <i>S</i> )- <b>4</b> | 6         | 189.15          | 1.4            |
| (4 <i>R</i> , 6 <i>S</i> , 8 <i>S</i> )- <b>4</b> | 7         | 189.19          | 1.4            |
| (4 <i>R</i> , 6 <i>S</i> , 8 <i>S</i> )- <b>4</b> | 8         | 189.47          | 1.2            |
| (4 <i>R</i> , 6 <i>S</i> , 8 <i>S</i> )- <b>4</b> | 9         | 189.88          | 1.1            |
| (4 <i>R</i> , 6 <i>S</i> , 8 <i>S</i> )- <b>4</b> | 10        | 192.54          | 0.4            |

|                                           |    |        |      |
|-------------------------------------------|----|--------|------|
| (4 <i>S</i> , 6 <i>R</i> , 8 <i>R</i> )-4 | 1  | 183.06 | 32.8 |
| (4 <i>S</i> , 6 <i>R</i> , 8 <i>R</i> )-4 | 2  | 183.28 | 30.0 |
| (4 <i>S</i> , 6 <i>R</i> , 8 <i>R</i> )-4 | 3  | 183.95 | 22.9 |
| (4 <i>S</i> , 6 <i>R</i> , 8 <i>R</i> )-4 | 4  | 189.15 | 2.8  |
| (4 <i>S</i> , 6 <i>R</i> , 8 <i>R</i> )-4 | 5  | 189.19 | 2.8  |
| (4 <i>S</i> , 6 <i>R</i> , 8 <i>R</i> )-4 | 6  | 189.47 | 2.5  |
| (4 <i>S</i> , 6 <i>R</i> , 8 <i>R</i> )-4 | 7  | 189.88 | 2.1  |
| (4 <i>S</i> , 6 <i>R</i> , 8 <i>R</i> )-4 | 8  | 189.90 | 2.1  |
| (4 <i>S</i> , 6 <i>R</i> , 8 <i>R</i> )-4 | 9  | 193.31 | 0.5  |
| (4 <i>S</i> , 6 <i>R</i> , 8 <i>R</i> )-4 | 10 | 193.54 | 0.5  |
| (4 <i>S</i> , 6 <i>R</i> , 8 <i>S</i> )-4 | 1  | 186.46 | 50.7 |
| (4 <i>S</i> , 6 <i>R</i> , 8 <i>S</i> )-4 | 2  | 190.33 | 10.6 |
| (4 <i>S</i> , 6 <i>R</i> , 8 <i>S</i> )-4 | 3  | 190.36 | 10.5 |
| (4 <i>S</i> , 6 <i>R</i> , 8 <i>S</i> )-4 | 4  | 190.69 | 9.2  |
| (4 <i>S</i> , 6 <i>R</i> , 8 <i>S</i> )-4 | 5  | 191.57 | 6.5  |
| (4 <i>S</i> , 6 <i>R</i> , 8 <i>S</i> )-4 | 6  | 193.19 | 3.4  |
| (4 <i>S</i> , 6 <i>R</i> , 8 <i>S</i> )-4 | 7  | 194.79 | 1.8  |
| (4 <i>S</i> , 6 <i>R</i> , 8 <i>S</i> )-4 | 8  | 195.78 | 1.2  |
| (4 <i>S</i> , 6 <i>R</i> , 8 <i>S</i> )-4 | 9  | 196.25 | 1.0  |
| (4 <i>S</i> , 6 <i>R</i> , 8 <i>S</i> )-4 | 10 | 196.51 | 0.9  |
| (4 <i>R</i> , 6 <i>S</i> , 8 <i>R</i> )-4 | 1  | 186.46 | 37.6 |
| (4 <i>R</i> , 6 <i>S</i> , 8 <i>R</i> )-4 | 2  | 187.36 | 26.2 |
| (4 <i>R</i> , 6 <i>S</i> , 8 <i>R</i> )-4 | 3  | 190.33 | 7.9  |
| (4 <i>R</i> , 6 <i>S</i> , 8 <i>R</i> )-4 | 4  | 190.36 | 7.8  |
| (4 <i>R</i> , 6 <i>S</i> , 8 <i>R</i> )-4 | 5  | 190.69 | 6.8  |
| (4 <i>R</i> , 6 <i>S</i> , 8 <i>R</i> )-4 | 6  | 191.57 | 4.8  |
| (4 <i>R</i> , 6 <i>S</i> , 8 <i>R</i> )-4 | 7  | 193.19 | 2.5  |
| (4 <i>R</i> , 6 <i>S</i> , 8 <i>R</i> )-4 | 8  | 194.79 | 1.3  |
| (4 <i>R</i> , 6 <i>S</i> , 8 <i>R</i> )-4 | 9  | 195.78 | 0.9  |

(4*R*, 6*S*, 8*R*)-4

10

196.25

0.7

**Table S8.** Energies of **4** at B3LYP/6-31+g(d) level in methanol.

| Configuration                             | Conformer | E (Hartree)   | E (kcal/mol)      | Population (%) |
|-------------------------------------------|-----------|---------------|-------------------|----------------|
| (4 <i>R</i> , 6 <i>S</i> , 8 <i>S</i> )-4 | 1         | -1074.6438965 | -674349.791492715 | 0.03           |
| (4 <i>R</i> , 6 <i>S</i> , 8 <i>S</i> )-4 | 2         | -1074.6482776 | -674352.540676776 | 2.99           |
| (4 <i>R</i> , 6 <i>S</i> , 8 <i>S</i> )-4 | 3         | -1074.6500363 | -674353.644278613 | 19.32          |
| (4 <i>R</i> , 6 <i>S</i> , 8 <i>S</i> )-4 | 4         | -1074.6502969 | -674353.807807719 | 25.47          |
| (4 <i>R</i> , 6 <i>S</i> , 8 <i>S</i> )-4 | 5         | -1074.6486764 | -674352.790927764 | 4.57           |
| (4 <i>R</i> , 6 <i>S</i> , 8 <i>S</i> )-4 | 6         | -1074.6481131 | -674352.437451381 | 2.52           |
| (4 <i>R</i> , 6 <i>S</i> , 8 <i>S</i> )-4 | 7         | -1074.6499711 | -674353.603364961 | 18.03          |
| (4 <i>R</i> , 6 <i>S</i> , 8 <i>S</i> )-4 | 8         | -1074.6483035 | -674352.556929285 | 3.08           |
| (4 <i>R</i> , 6 <i>S</i> , 8 <i>S</i> )-4 | 9         | -1074.6502322 | -674353.767207822 | 23.78          |
| (4 <i>R</i> , 6 <i>S</i> , 8 <i>S</i> )-4 | 10        | -1074.6457216 | -674350.936761216 | 0.20           |
| (4 <i>S</i> , 6 <i>R</i> , 8 <i>R</i> )-4 | 1         | -1074.6482776 | -674352.540676776 | 3.14           |
| (4 <i>S</i> , 6 <i>R</i> , 8 <i>R</i> )-4 | 2         | -1074.6500356 | -674353.643839356 | 20.25          |
| (4 <i>S</i> , 6 <i>R</i> , 8 <i>R</i> )-4 | 3         | -1074.6502972 | -674353.807995972 | 26.73          |
| (4 <i>S</i> , 6 <i>R</i> , 8 <i>R</i> )-4 | 4         | -1074.6481131 | -674352.437451381 | 2.64           |
| (4 <i>S</i> , 6 <i>R</i> , 8 <i>R</i> )-4 | 5         | -1074.6499708 | -674353.603176708 | 18.91          |
| (4 <i>S</i> , 6 <i>R</i> , 8 <i>R</i> )-4 | 6         | -1074.6483034 | -674352.556866534 | 3.23           |
| (4 <i>S</i> , 6 <i>R</i> , 8 <i>R</i> )-4 | 7         | -1074.6502322 | -674353.767207822 | 24.95          |
| (4 <i>S</i> , 6 <i>R</i> , 8 <i>R</i> )-4 | 8         | -1074.64276   | -674349.0783276   | 0.01           |
| (4 <i>S</i> , 6 <i>R</i> , 8 <i>R</i> )-4 | 9         | -1074.6452307 | -674350.628716557 | 0.12           |
| (4 <i>S</i> , 6 <i>R</i> , 8 <i>R</i> )-4 | 10        | -1074.6435866 | -674349.597027366 | 0.02           |
| (4 <i>S</i> , 6 <i>R</i> , 8 <i>S</i> )-4 | 1         | -1074.6448259 | -674350.374700509 | 2.11           |
| (4 <i>S</i> , 6 <i>R</i> , 8 <i>S</i> )-4 | 2         | -1074.6468365 | -674351.636372115 | 17.77          |
| (4 <i>S</i> , 6 <i>R</i> , 8 <i>S</i> )-4 | 3         | -1074.645307  | -674350.67659557  | 3.51           |
| (4 <i>S</i> , 6 <i>R</i> , 8 <i>S</i> )-4 | 4         | -1074.6453548 | -674350.706590548 | 3.69           |
| (4 <i>S</i> , 6 <i>R</i> , 8 <i>S</i> )-4 | 5         | -1074.6447544 | -674350.329833544 | 1.95           |

|                                           |    |               |                   |       |
|-------------------------------------------|----|---------------|-------------------|-------|
| (4 <i>S</i> , 6 <i>R</i> , 8 <i>S</i> )-4 | 6  | -1074.6439081 | -674349.798771831 | 0.80  |
| (4 <i>S</i> , 6 <i>R</i> , 8 <i>S</i> )-4 | 7  | -1074.6477521 | -674352.210920271 | 46.91 |
| (4 <i>S</i> , 6 <i>R</i> , 8 <i>S</i> )-4 | 8  | -1074.6468436 | -674351.640827436 | 17.91 |
| (4 <i>S</i> , 6 <i>R</i> , 8 <i>S</i> )-4 | 9  | -1074.6446947 | -674350.292371197 | 1.84  |
| (4 <i>S</i> , 6 <i>R</i> , 8 <i>S</i> )-4 | 10 | -1074.6453061 | -674350.676030811 | 3.51  |
| (4 <i>R</i> , 6 <i>S</i> , 8 <i>R</i> )-4 | 1  | -1074.6448254 | -674350.374386754 | 2.18  |
| (4 <i>R</i> , 6 <i>S</i> , 8 <i>R</i> )-4 | 2  | -1074.6398926 | -674347.279005426 | 0.01  |
| (4 <i>R</i> , 6 <i>S</i> , 8 <i>R</i> )-4 | 3  | -1074.6468365 | -674351.636372115 | 18.42 |
| (4 <i>R</i> , 6 <i>S</i> , 8 <i>R</i> )-4 | 4  | -1074.6453069 | -674350.676532819 | 3.64  |
| (4 <i>R</i> , 6 <i>S</i> , 8 <i>R</i> )-4 | 5  | -1074.6453547 | -674350.706527797 | 3.83  |
| (4 <i>R</i> , 6 <i>S</i> , 8 <i>R</i> )-4 | 6  | -1074.6447544 | -674350.329833544 | 2.03  |
| (4 <i>R</i> , 6 <i>S</i> , 8 <i>R</i> )-4 | 7  | -1074.6439112 | -674349.800717112 | 0.83  |
| (4 <i>R</i> , 6 <i>S</i> , 8 <i>R</i> )-4 | 8  | -1074.6477518 | -674352.210732018 | 48.60 |
| (4 <i>R</i> , 6 <i>S</i> , 8 <i>R</i> )-4 | 9  | -1074.6468436 | -674351.640827436 | 18.56 |
| (4 <i>R</i> , 6 <i>S</i> , 8 <i>R</i> )-4 | 10 | -1074.6446958 | -674350.293061458 | 1.90  |

(4*R*, 6*S*, 8*S*)-4

|                                                                                     |                                                                                     |                                                                                       |
|-------------------------------------------------------------------------------------|-------------------------------------------------------------------------------------|---------------------------------------------------------------------------------------|
| 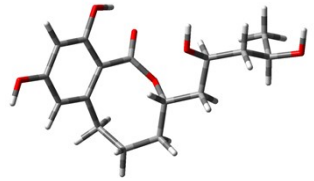 |  |  |
| Conf.1 (0.03%)                                                                      | Conf.2 (2.99%)                                                                      | Conf.3 (19.32%)                                                                       |
|  |  |  |
| Conf.4 (25.47%)                                                                     | Conf.5 (4.57%)                                                                      | Conf.6 (2.52%)                                                                        |
|  |  |  |

|                                                                                   |                |                 |
|-----------------------------------------------------------------------------------|----------------|-----------------|
| Conf.7 (18.03%)                                                                   | Conf.8 (3.08%) | Conf.9 (23.78%) |
| 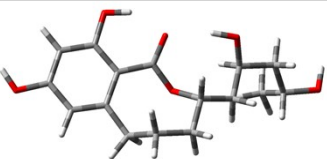 |                |                 |
| Conf.10 (0.20%)                                                                   |                |                 |

(4*S*, 6*R*, 8*R*)-4

|                                                                                     |                                                                                     |                                                                                       |
|-------------------------------------------------------------------------------------|-------------------------------------------------------------------------------------|---------------------------------------------------------------------------------------|
| 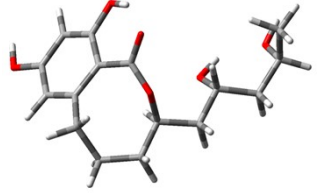   |    |    |
| Conf.1 (3.14%)                                                                      | Conf.2 (20.25%)                                                                     | Conf.3 (26.73%)                                                                       |
|   |   |   |
| Conf.4 (2.64%)                                                                      | Conf.5 (18.91%)                                                                     | Conf.6 (3.23%)                                                                        |
|  |  |  |
| Conf.7 (24.95%)                                                                     | Conf.8 (0.01%)                                                                      | Conf.9 (0.12%)                                                                        |
|  |                                                                                     |                                                                                       |
| Conf.10 (0.02%)                                                                     |                                                                                     |                                                                                       |

(4*S*, 6*R*, 8*S*)-4

|                                                                                     |                                                                                    |                                                                                     |
|-------------------------------------------------------------------------------------|------------------------------------------------------------------------------------|-------------------------------------------------------------------------------------|
| 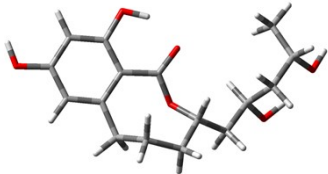   |   |  |
| Conf.1 (2.11%)                                                                      | Conf.2 (17.77%)                                                                    | Conf.3 (3.51%)                                                                      |
|    |   |  |
| Conf.4 (3.69%)                                                                      | Conf.5 (1.95%)                                                                     | Conf.6 (0.80%)                                                                      |
|   |  |  |
| Conf.7 (46.91%)                                                                     | Conf.8 (17.91%)                                                                    | Conf.9 (1.84%)                                                                      |
|  |                                                                                    |                                                                                     |
| Conf.10 (3.51%)                                                                     |                                                                                    |                                                                                     |

(4*R*, 6*S*, 8*R*)-4

|                                                                                     |                                                                                     |                                                                                       |
|-------------------------------------------------------------------------------------|-------------------------------------------------------------------------------------|---------------------------------------------------------------------------------------|
| 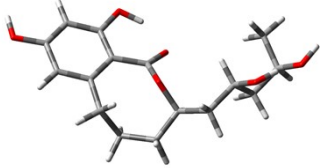 |  |  |
| Conf.1 (2.18%)                                                                      | Conf.2 (0.01%)                                                                      | Conf.3 (18.42%)                                                                       |

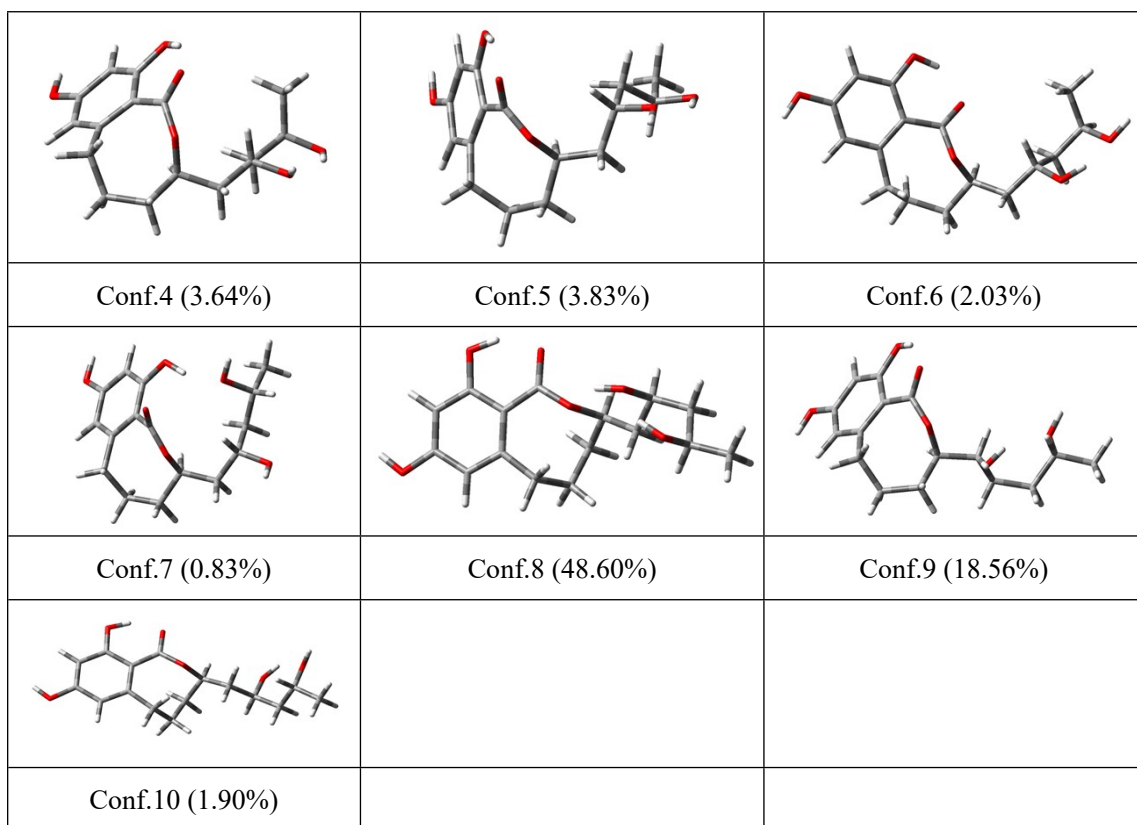

**Figure S36.** The optimized conformers and equilibrium populations of **4**.

**Table S9.** Specific data of the half-bandwidth and UV shifts for compounds **1–4**.

| Compounds | Half-bandwidth (eV) | UV shift (nm) |
|-----------|---------------------|---------------|
| <b>1</b>  | 0.3                 | -11           |
| <b>2</b>  | 0.3                 | +6            |
| <b>3</b>  | 0.23                | +15           |
| <b>4</b>  | 0.2                 | 0             |



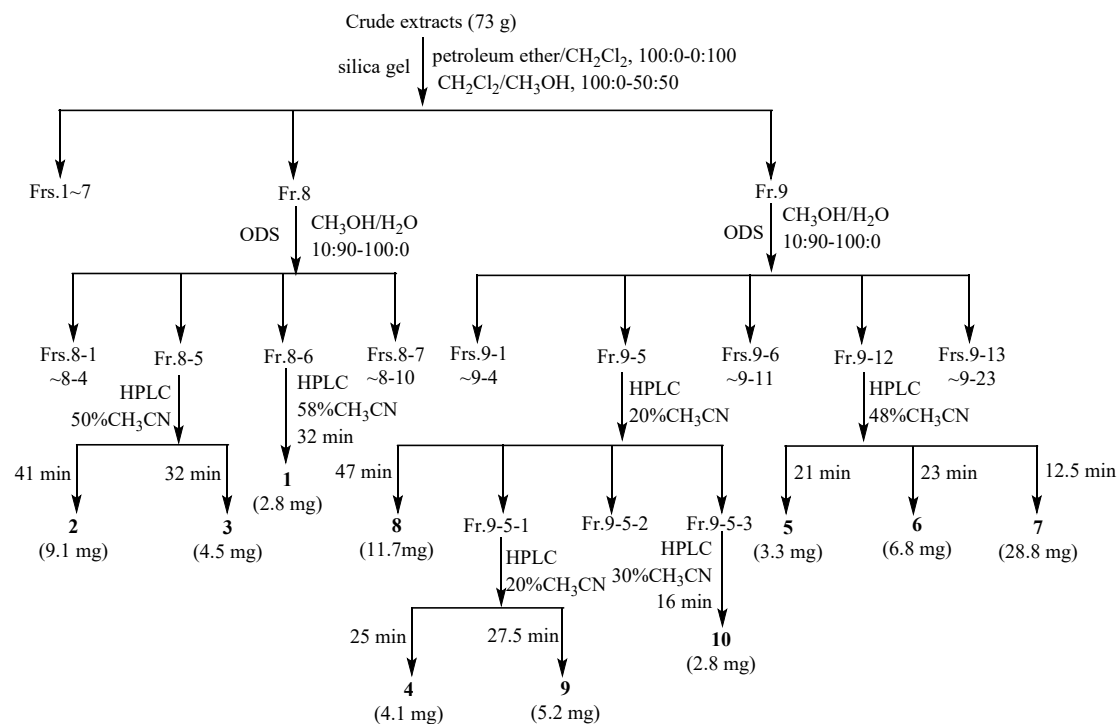

**Scheme S1.** The isolation process of compounds 1–10.

**Physicochemical data of known compounds 5–12.**

LL-Z1640-2 (**5**): white powder, ECD (0.25 mg/mL, CH<sub>3</sub>OH)  $\lambda_{\max}(\Delta\epsilon)$  239 (+22.1), 270 (–20.3) nm; <sup>1</sup>H NMR (500 MHz, DMSO-*d*<sub>6</sub>)  $\delta_{\text{H}}$ : 11.76 (1H, s, 16-OH), 6.74 (1H, d, *J* = 15.4 Hz, H-11), 6.43 (1H, d, *J* = 2.7 Hz, H-13), 6.39 (1H, d, *J* = 2.6 Hz, H-15), 6.15 – 6.24 (1H, m, H-4), 6.00 – 6.12 (1H, m, H-10), 5.21 (1H, m, H-5), 5.00 (1H, m, H-2), 4.38 (1H, s, H-7), 3.85 (1H, s, H-8), 3.78 (3H, s, H-19), 3.13 – 3.24 (1H, m, H-3a), 2.55 – 2.65 (1H, m, H-3b), 2.09 (2H, d, *J* = 7.0 Hz, H-9), 1.37 (3H, d, *J* = 6.0 Hz, H-1). <sup>13</sup>C NMR (125 MHz, DMSO-*d*<sub>6</sub>)  $\delta_{\text{C}}$ : 20.0 (CH<sub>3</sub>, C-1), 36.0 (CH<sub>2</sub>, C-9), 36.3 (CH<sub>2</sub>, C-3), 55.5 (CH<sub>3</sub>, C-19), 72.7 (CH, C-2), 73.7 (CH, C-8), 81.7 (CH, C-7), 100.2 (CH, C-15), 104.7 (qC, C-17), 106.0 (CH, C-13), 126.7 (CH, C-10), 130.9 (CH, C-11), 132.4 (CH, C-5), 142.3 (qC, C-12), 143.9 (CH, C-4), 163.4 (qC, C-14), 163.6 (qC, C-16), 170.4 (qC, C-18), 200.9 (qC, C-6).

Deoxy-aigialomycin C (**6**): white powder; <sup>1</sup>H NMR (500 MHz, CDCl<sub>3</sub>)  $\delta_{\text{H}}$ : 11.81 (1H, s, 16-OH), 7.11 (1H, dt, *J* = 15.9, 1.9 Hz, H-11), 6.53 (1H, d, *J* = 2.6 Hz, H-13), 6.38 (1H, d, *J* = 2.6 Hz, H-15), 6.13 (1H, dt, *J* = 16.0, 5.2 Hz, H-4), 5.94 (1H, ddd, *J* = 15.1, 9.2, 5.6 Hz, H-10), 5.53 – 5.60 (1H, m, H-5), 5.48 – 5.53 (1H, m, H-2), 3.88 (1H, t, *J* = 8.6 Hz, H-6), 3.82 (3H, s, H-19), 3.48 – 3.56 (1H, m, H-7), 2.56 (2H, m, H-8), 2.41 (1H, m, H-3a), 2.00 – 2.12 (2H, m, H-9), 1.63 (1H, ddd, *J* = 14.6, 7.2, 3.9 Hz, H-3b), 1.40 (3H, d, *J* = 6.5 Hz, H-1). <sup>13</sup>C NMR (125 MHz, CDCl<sub>3</sub>)  $\delta_{\text{C}}$ : 18.7 (CH<sub>3</sub>, C-1), 27.2 (CH<sub>2</sub>, C-8), 31.0 (CH<sub>2</sub>, C-9), 37.5 (CH<sub>2</sub>, C-3), 55.5 (CH<sub>3</sub>, C-19), 71.6 (CH, C-2), 73.2 (CH, C-6), 77.2 (CH, C-7), 100.0 (CH, C-15), 104.2 (qC, C-17), 106.9 (CH, C-13), 128.8 (CH, C-4), 130.1 (CH, C-10), 132.4 (CH, C-5), 134.3 (CH, C-11), 142.8 (qC, C-12), 164.0 (qC, C-14), 165.4 (qC, C-16), 171.3 (qC, C-18).

Zeaenol (**7**): white powder; <sup>1</sup>H NMR (500 MHz, DMSO-*d*<sub>6</sub>)  $\delta_{\text{H}}$ : 11.29 (1H, s, 16-OH), 6.85 (1H, d, *J* = 15.5 Hz, H-11), 6.45 (1H, d, *J* = 2.5 Hz, H-13), 6.37 (1H, d, *J* = 2.6 Hz, H-15), 6.08 (1H, m, H-4), 5.79 (1H, m, H-10), 5.56 (1H, dd, *J* = 15.5, 7.4 Hz, H-5), 5.15 (1H, m, H-2), 4.49 – 4.78 (1H, m, H-6), 3.88 (1H, t, *J* = 7.7 Hz, H-8), 3.77 (3H, s, H-19), 3.52 (1H, d, *J* = 7.5 Hz, H-7), 2.53 (2H, m, H-3), 2.45 (1H, dd, *J* = 7.3, 3.5 Hz, H-9a), 2.37 (1H, m, H-9b), 1.37 (3H, d, *J* = 6.3 Hz, H-1). <sup>13</sup>C NMR (125 MHz,

DMSO-*d*<sub>6</sub>)  $\delta_C$ : 19.3 (CH<sub>3</sub>, C-1), 35.5 (CH<sub>2</sub>, C-9), 36.9 (CH<sub>2</sub>, C-3), 55.4 (CH<sub>3</sub>, C-19), 72.2 (CH, C-2), 72.4 (CH, C-6), 73.5 (CH, C-8), 78.1 (CH, C-7), 100.0 (CH, C-15), 104.9 (qC, C-17), 106.5 (CH, C-13), 126.6 (CH, C-4), 130.5 (CH, C-10), 132.4 (CH, C-5), 132.8 (CH, C-11), 141.5 (qC, C-12), 162.0 (qC, C-14), 162.8 (qC, C-16), 169.9 (qC, C-18).

8-Hydroxy-6-methoxy-3-methylisocoumarin (**8**): yellow oil; <sup>1</sup>H NMR (500 MHz, CD<sub>3</sub>OD)  $\delta_H$ : 6.45 (1H, d, *J* = 2.1 Hz, H-8), 6.31 (1H, d, *J* = 2.1 Hz, H-6), 6.21 (1H, s, H-4), 3.89 (3H, s, H-11), 2.19 (3H, s, H-12). <sup>13</sup>C NMR (125 MHz, CD<sub>3</sub>OD)  $\delta_C$ : 19.2 (CH<sub>3</sub>, C-12), 56.3 (CH<sub>3</sub>, C-11), 99.5 (CH, C-8), 101.8 (CH, C-6), 103.7 (qC, C-10), 104.9 (CH, C-4), 144.0 (qC, C-5), 156.2 (qC, C-3), 162.3 (qC, C-9), 165.1 (qC, C-7), 166.3 (qC, C-1).

2-Methyl-5-carboxymethyl-7-hydroxychromone (**9**): white powder; <sup>1</sup>H NMR (500 MHz, DMSO-*d*<sub>6</sub>)  $\delta_H$ : 11.98 (1H, s, 12-OH), 10.64 (1H, s, 7-OH), 6.71 (1H, d, *J* = 2.3 Hz, H-8), 6.65 (1H, d, *J* = 2.3 Hz, H-6), 5.97 (1H, s, H-3), 4.00 (2H, s, H-11), 2.28 (3H, s, H-13). <sup>13</sup>C NMR (125 MHz, DMSO-*d*<sub>6</sub>)  $\delta_C$ : 19.4 (CH<sub>3</sub>, C-13), 40.2 (CH<sub>2</sub>, C-11), 101.5 (CH, C-8), 110.5 (CH, C-6), 114.3 (qC, C-10), 117.9 (CH, C-3), 138.0 (qC, C-5), 158.9 (qC, C-9), 160.9 (qC, C-7), 164.2 (qC, C-2), 172.1 (qC, C-12), 177.9 (qC, C-4).

2-Methyl-5-carboxymethyl-7-hydroxychromanone (**10**): white powder; <sup>1</sup>H NMR (500 MHz, DMSO-*d*<sub>6</sub>)  $\delta_H$ : 11.95 (1H, s, 12-OH), 10.48 (1H, s, 7-OH), 6.29 (1H, d, *J* = 2.3 Hz, H-8), 6.24 (1H, d, *J* = 2.3 Hz, H-6), 4.51 (1H, m, H-2), 3.79 (2H, d, *J* = 4.4 Hz, H-11), 2.56 (2H, dd, *J* = 16.6, 12.0 Hz, H-3), 1.36 (3H, d, *J* = 6.2 Hz, H-13). <sup>13</sup>C NMR (125 MHz, DMSO-*d*<sub>6</sub>)  $\delta_C$ : 20.5 (CH<sub>3</sub>, C-13), 40.6 (CH<sub>2</sub>, C-11), 44.7 (CH<sub>2</sub>, C-3), 73.4 (CH, C-2), 101.8 (CH, C-8), 112.0 (qC, C-10), 114.2 (CH, C-6), 139.5 (qC, C-5), 162.8 (qC, C-9), 164.1 (qC, C-7), 172.0 (qC, C-12), 191.3 (qC, C-4).

#### The ITS sequence of *Curvularia lunata* GXIMD 02512

```
CTGTACGCGGCTGTGCTCTCGGGCCAGTTTTGCGGAGGCTGAATTATTTATTACCCTT
GTCTTTTGC GCACTTGTGTTCCTGGGCGGGTTTCGCCCGCCACCAGGACCACATCATAAA
CCTTTTTTATGCAGTTGCAATCAGCGTCAGTATAACAAATGTAAATCATTTACAACCTTTCA
ACAACGGATCTCTTGGTTCTGGCATCGATGAAGAACGCAGCGAAATGCGATACGTAGTGT
GAATTGCAGAATTCAGTGAATCATCGAATCTTTGAACGCACATTGCGCCCTTTGGTATTCC
AAAGGGCATGCCTGTTCGAGCGTCATTTGTACCCTCAAGCTTTGCTTGGTGTGGGCGTTT
TTTGTCTTTGGTTGCCAAAGACTCGCCTTAAAAGGATTGGCAGCCGGCCTACTGGTTTTCGC
AGCGCAGCACATTTTTGCGCTTGAATCAGCAAAAAGAGGACGGCAATCCATCAAGACTCC
TTCTCACGTTTGACCTCGGATCAGGTAGGGATACCC
```

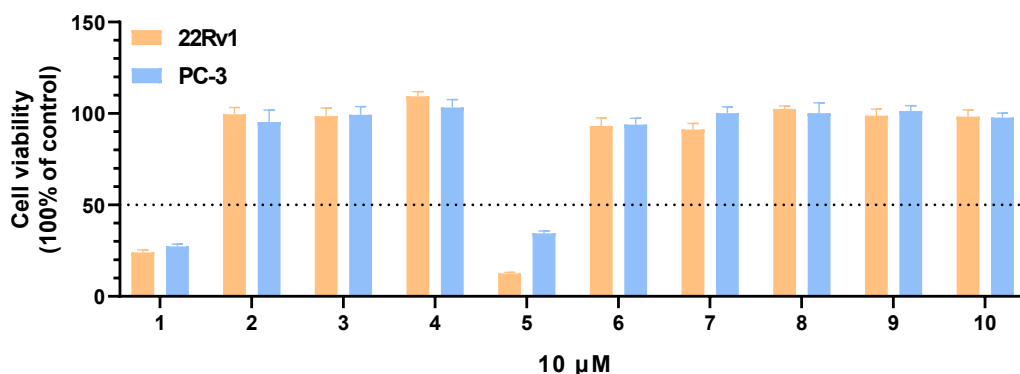

**Figure S37.** The cell viability of 22RV1 and PC-3 cell lines by treating with compounds **1–10** at 10  $\mu$ M after 72 h

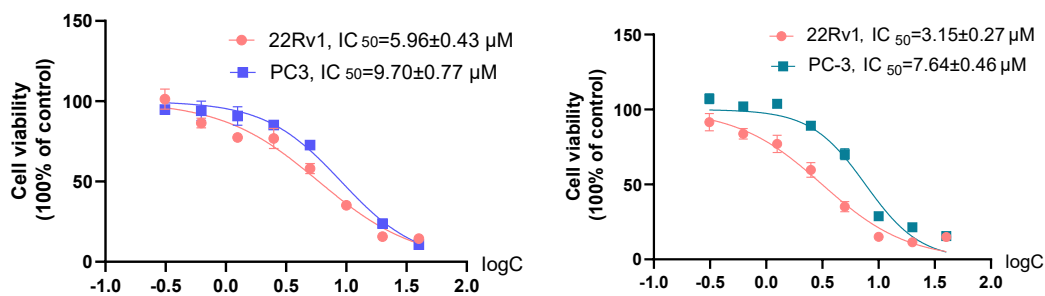

Figure S38. Cytotoxicity against 22RV1 and PC-3 cell lines of **1** (left) and **5** (right)

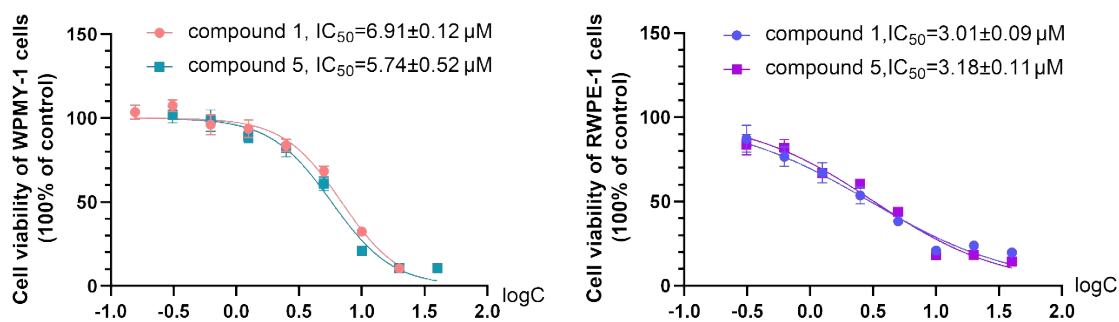

Figure S39. Cytotoxicity of compounds **1** and **5** towards two normal prostate cancer cells, WPMY-1 (left) and RWPE-1 (right).

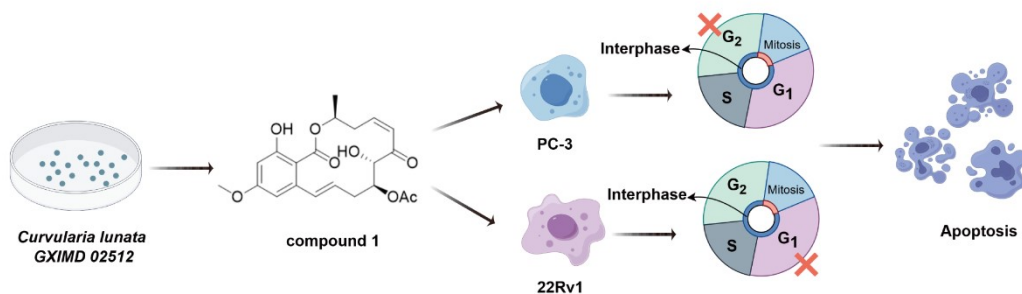

Figure S40. the primary anti-PC mechanism of compound **1**.
